# Supplementary material for: Can manual ability be measured with a generic ABILHAND scale? A cross-sectional study conducted on six diagnostic groups
Source: PubMed Central journal article supplement — BMJ Open. 2012 Oct 31;2(6):e001807. doi: 10.1136/bmjopen-2012-001807 (PMC3533037; doi:10.1136/bmjopen-2012-001807), 2012-10-31
Supplement: bmjopen-2012-001807.draft_revisions.pdf [file bmjopen-2012-001807.draft_revisions.pdf]

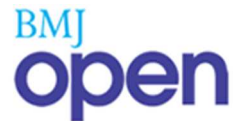

**Can manual ability be measured with a generic ABILHAND scale?: a cross-sectional study conducted on six diagnostic groups**

|                                 |                                                                                                                                                                                                                                                                                                                                                                                                                                      |
|---------------------------------|--------------------------------------------------------------------------------------------------------------------------------------------------------------------------------------------------------------------------------------------------------------------------------------------------------------------------------------------------------------------------------------------------------------------------------------|
| Journal:                        | <i>BMJ Open</i>                                                                                                                                                                                                                                                                                                                                                                                                                      |
| Manuscript ID:                  | bmjopen-2012-001807                                                                                                                                                                                                                                                                                                                                                                                                                  |
| Article Type:                   | Research                                                                                                                                                                                                                                                                                                                                                                                                                             |
| Date Submitted by the Author:   | 13-Jul-2012                                                                                                                                                                                                                                                                                                                                                                                                                          |
| Complete List of Authors:       | Arnould, Carlyne; Haute Ecole Louvain en Hainaut, Physical and Occupational Therapy Departments<br>Vandervelde, Laure; Institut Parnasse Deux-Alice, Physical Therapy Department<br>Batcho, Charles; Université catholique de Louvain, Institute of Neuroscience<br>Penta, Massimo; Université catholique de Louvain, Institute of Neuroscience<br>Thonnard, Jean-Louis; Université catholique de Louvain, Institute of Neuroscience |
| <b>Primary Subject Heading</b>: | Rehabilitation medicine                                                                                                                                                                                                                                                                                                                                                                                                              |
| Secondary Subject Heading:      | Paediatrics, Cardiovascular medicine                                                                                                                                                                                                                                                                                                                                                                                                 |
| Keywords:                       | REHABILITATION MEDICINE, Adult neurology < NEUROLOGY, Paediatric neurology < NEUROLOGY, Neuromuscular disease < NEUROLOGY, Hand & wrist < ORTHOPAEDIC & TRAUMA SURGERY                                                                                                                                                                                                                                                               |
|                                 |                                                                                                                                                                                                                                                                                                                                                                                                                                      |

SCHOLARONE™  
Manuscripts

**ARTICLE TITLE:**

Can manual ability be measured with a generic ABILHAND scale?: a cross-sectional study  
conducted on six diagnostic groups

**AUTHORS:**

Carlyne Arnould<sup>1</sup> (PhD), Laure Vandervelde<sup>2</sup> (PhD), Charles Sèbiyo Batcho<sup>3</sup> (PT), Massimo  
Penta<sup>3</sup> (PhD), Jean-Louis Thonnard<sup>3</sup> (PhD)

1 Physical and Occupational Therapy Departments, Paramedical Category, Haute Ecole  
Louvain en Hainaut, Montignies-sur-Sambre, Belgium

2 Physical Therapy Department, Institut Parnasse Deux-Alice, Haute Ecole Leonard de  
Vinci, Brussels, Belgium

3 Institute of Neuroscience, Université catholique de Louvain, Brussels, Belgium

**CORRESPONDING AUTHOR:**

Dr. Carlyne Arnould

Physical and Occupational Therapy Departments

Paramedical Category

Haute Ecole Louvain en Hainaut

Rue Trieu Kaisin, 134

6061 Montignies-sur-Sambre

Belgium

Tel. + 32 498 59 31 33

E-mail. [carlyne.arnould@gmail.com](mailto:carlyne.arnould@gmail.com)

1  
2  
3  
4  
5 **KEYWORDS:** motor skills disorders, upper extremity, hand, activities of daily living,  
6  
7 questionnaires  
8  
9

## 10 11 **WORD COUNTS**

12  
13  
14 **The title includes 105 characters.**

15  
16 **The abstract includes 263 words.**

17  
18 **This manuscript includes 3 tables and 3 figures, 2959 words**  
19

## 20 21 22 **LIST OF TABLES**

23  
24  
25 Table 1. Sample characteristics (n = 732)

26  
27 Table 2. Final calibration of the six diagnostic groups after the splitting of the DIF items into  
28  
29 two main groups: asymmetric disorders (CS, CP) and symmetric disorders (RA, SSC, NMDc,  
30  
31 NMDa)  
32

33  
34 Table 3. Comparison of generic and disease-specific scales  
35  
36  
37

## 38 39 **LIST OF FIGURES**

40  
41 Figure 1. Disease-specific patterns of item difficulty according to the bimanual or proximal  
42  
43 nature of the activities showing a Differential Item Functioning

44  
45 Figure 2. PCA results based upon differences between disease-specific difficulty of the split  
46  
47 DIF items and the average item difficulty across all diagnoses

48  
49 Figure 3. Distribution of manual ability measures for each diagnosis  
50  
51  
52  
53  
54  
55  
56  
57  
58  
59  
60

**ABSTRACT**

**Objectives:** Several ABILHAND Rasch-built manual ability scales were previously developed for chronic stroke (CS), cerebral palsy (CP), rheumatoid arthritis (RA), systemic sclerosis (SSc), and neuromuscular disorders (NMD). The present study aimed to explore the applicability of a generic manual ability scale unbiased by diagnosis across various populations.

**Design:** cross-sectional study.

**Setting:** outpatient clinic homes (CS, CP, RA), specialized centers (CP), reference centers (CP, NMD), and university hospitals (SSc).

**Participants:** 762 patients from six diagnostic groups: 103 CS adults, 113 CP children, 112 RA adults, 156 SSc adults, 124 NMD children and 124 NMD adults.

**Primary and secondary outcome measures:** manual ability as measured by the ABILHAND disease-specific questionnaires, diagnosis, and nature (i.e., uni- or bi-manual involvement and proximal or distal joints involvement) of the ABILHAND items.

**Results:** The difficulty of most manual activities was diagnosis-dependent. A principal component analysis highlighted that 57% of the variance in item locations between diagnoses was explained by the symmetric or asymmetric nature of the disorders. A generic scale was constructed with 11 items sharing a common location among diagnoses and 41 items displaying a category-specific location (asymmetric: CS, CP; and symmetric: RA, SSc NMD). This generic scale showed that CP and NMD children had significantly less manual ability than RA patients, who had significantly less manual ability than CS, SSc, and NMD adults. However, the generic scale was less discriminative and responsive to small deficits than disease-specific instruments.

1  
2  
3 **Conclusions:** Our findings emphasize the importance of implementing disease-specific  
4 assessments (with ABILHAND) and highlight the risk of using generic scales without prior  
5 investigation of the diagnosis-invariance of item difficulties.  
6  
7  
8  
9  
10  
11  
12  
13  
14  
15  
16  
17  
18  
19  
20  
21  
22  
23  
24  
25  
26  
27  
28  
29  
30  
31  
32  
33  
34  
35  
36  
37  
38  
39  
40  
41  
42  
43  
44  
45  
46  
47  
48  
49  
50  
51  
52  
53  
54  
55  
56  
57  
58  
59  
60

## ARTICLE SUMMARY

### Article focus:

- To explore the applicability of a generic ABILHAND manual ability scale unbiased by diagnosis across various clinical populations.
- To analyse prior data from cross-sectional studies that developed disease-specific manual ability questionnaires in order to investigate the co-calibration of patient perceived item difficulty on a common metric.

### Key messages:

- The difficulty of most manual activities was diagnosis-dependent and depends on the specificity of the underlying disease since the vast majority (85%) of the difficulty variations observed in manual activities across diagnostic groups was explained by 1) the symmetric or asymmetric nature of the disorder (57% of the variance) and 2) the proximal or distal nature of the disorder (28% of the variance).
- Our findings are consistent with several studies showing that disease-specific instruments are substantially more discriminative and responsive to small deficits than generic instruments.
- Our findings emphasize the importance of implementing disease-specific assessments (with ABILHAND) and highlight the risk of using generic scales in neurological clinical practice without prior investigation of the item difficulties invariance across diagnostic groups.

### Strengths and limitations of this study:

- Our study explores a large set of data (732 patients) spread out evenly over 6 diagnostic groups (stroke adults, cerebral palsy children, adults with rheumatoid arthritis, adults with systemic sclerosis, children and adults with neuromuscular disorders).

- 1  
2  
3  
4  
5  
6  
7  
8  
9  
10  
11  
12  
13  
14  
15  
16  
17  
18  
19  
20  
21  
22  
23  
24  
25  
26  
27  
28  
29  
30  
31  
32  
33  
34  
35  
36  
37  
38  
39  
40  
41  
42  
43  
44  
45  
46  
47  
48  
49  
50  
51  
52  
53  
54  
55  
56  
57  
58  
59  
60
- Our study proposes an original methodology (combining differential item functioning tests, principal component analysis, and manual activities categorization) that investigates the factors contributing to the hierarchy of manual item difficulty observed across diagnoses allowing the nature of manual ability to be better understood.

For peer review only

## INTRODUCTION

Over the past decade, questionnaires and health status assessments have become widely used as outcome measures in clinical trials.[1] Consequently, rating scale data are becoming integral to patient care, prescribing, and policymaking. It is essential that functional rating scales provide scientifically robust and clinically meaningful results to ensure appropriate interpretations and decision-making regarding disease effects, clinical implications, treatment, health policies, and resource allocation. Unfortunately, most rating scales generate ordinal data by summing scores assigned to a set of items representing the intended variable, and metric properties of raw ordinal scores are known to have limited validity.[2, 3] In view of this limitation, the Rasch model [4] is becoming increasingly popular for health measurements because it enables the direct transformation from ordinal scores to linear measures with a constant unit.

Over the last 20 years, our research group has developed several manual ability rating scales (known under the umbrella term of ABILHAND questionnaires) by applying the Rasch model to various diagnostic groups. ABILHAND scales are self-administered questionnaires that measure “manual ability”, which is defined as, “the capacity to manage daily activities requiring the use of the upper limbs, whatever the strategies involved”. [5] Disease-specific manual ability “rulers” were previously developed for the following patient groups: chronic stroke (CS), [5] cerebral palsy (CP), [6] rheumatoid arthritis (RA), [7] systemic sclerosis (SSc), [8] and neuromuscular disorders (NMD). [9] Each ABILHAND scale has its own Rasch-derived item difficulty calibration, which defines a disease-specific manual ability measurement continuum. ABILHAND questionnaires present good psychometric qualities, including linearity, unidimensionality, construct validity, and test-retest reliability. Disease-specific scales, which are highly sensitive and detect small, yet clinically important changes, are frequently used in research because they ensure comprehensive assessment of



1  
2  
3 health aspects directly related to the condition.[10, 11] In contrast, generic scales best meet  
4  
5 rehabilitation requirements when disability treatment is not dependent upon a specific  
6  
7 underlying diagnosis.[12] Generic scales enable comparisons of various diagnoses and  
8  
9 healthcare interventions, which may provide useful data for health policies, cost-effective  
10  
11 analyses, and resource allocation.[10, 11] From a metric point of view, it is possible to co-  
12  
13 calibrate various disease-specific ABILHAND questionnaire items on the same scale,  
14  
15 provided that the scales are based on an identical theoretical unidimensional construct.[13] In  
16  
17 theory, and similar to the graduations of a metric ruler, items should have the same difficulty  
18  
19 for all diagnostic groups, regardless of the disease being measured. In practice, item difficulty  
20  
21 hierarchy may vary across groups, demonstrating Differential Item Functioning (DIF).[14]  
22  
23 The Rasch model can be used to test the invariance of item difficulty hierarchy and to  
24  
25 accommodate for DIF.[15] Nevertheless, the clinical application of generic rating scale usage  
26  
27 across various disease populations remains questionable.  
28  
29

30  
31 The present study explored the applicability of a generic ABILHAND scale, which is  
32  
33 unbiased by diagnostic criteria, across various clinical populations. We analysed prior data  
34  
35 from cross-sectional studies that developed disease-specific manual ability questionnaires in  
36  
37 order to investigate the co-calibration of patient perceived item difficulty on a common  
38  
39 metric.  
40  
41  
42  
43  
44

## 45 **METHODS**

### 46 **Subjects**

47  
48 Data from 732 subjects, who previously provided informed consent, were analysed. Patients  
49  
50 with the following disorders were evaluated: 103 CS adults,[5] 113 CP children,[6] 112 RA  
51  
52 adults,[7] 156 SSc adults,[8] 124 NMD children (NMDc) and 124 NMD adults (NMDa).[9]  
53  
54  
55  
56  
57  
58  
59  
60

Table 1 provides patient characteristics. The ethics committee of the Université catholique de Louvain, Faculty of Medicine in Brussels, Belgium, authorized and approved the study.

**Table 1. Sample characteristics (n = 732)**

| Variables                 | CS         | CP        | RA         | SSc        | NMDc      | NMDa       |
|---------------------------|------------|-----------|------------|------------|-----------|------------|
| <b>Number of subjects</b> | 103        | 113       | 112        | 156        | 124       | 124        |
| <b>Mean age (range)*</b>  | 63 (24–84) | 10 (6–15) | 55 (25–82) | 54 (21–82) | 10 (6–16) | 47 (16–80) |
| <b>Sex</b>                |            |           |            |            |           |            |
| <b>Males</b>              | 64         | 67        | 29         | 32         | 84        | 69         |
| <b>Females</b>            | 39         | 46        | 83         | 124        | 40        | 55         |

\* years; CS = chronic stroke; CP = cerebral palsy; RA = rheumatoid arthritis; SSc = systemic sclerosis; NMDc = neuromuscular children; NMDa = neuromuscular adults.

### Manual ability measure

Original data included 83 manual ability activities, also called items, shared by at least two diagnostic groups. These items covered different domains of daily living such as feeding, grooming, or dressing. In addition, 12 items were child-specific (e.g., “Putting on a backpack/schoolbag”), 19 were adult-specific (e.g., “Hammering a nail”), and 52 were common to both groups (e.g. “Buttoning up trousers”). Adult patients and children’s parents provided their perceived difficulty in performing each activity based upon a three-level scale: impossible (0), difficult (1) or easy (2). Each activity had to be completed without technical or human assistance and irrespective of the limb(s) and adaptive strategies used. Missing values were included when a given diagnostic group did not provide responses for a particular item, as the activity may not have been submitted to a group. The nature of the items was assessed by ten occupational or physical therapists according to the following criteria: uni- or bi-manual involvement required to perform the activity; and involvement of proximal or distal joints.

### Data analysis

The RUMM2020<sup>®</sup> Rasch analysis computer program analysed all responses. Manual ability was the only personal attribute theorized to account for the probability of choosing a given response. This requirement, called “unidimensionality”, has been tested using fit statistic indices as described elsewhere.[16, 17] Unidimensionality also requires that patients with identical ability, but different diagnoses, have the same probability of succeeding any particular item. Consequently, the invariance of item difficulty across patient diagnostic groups must be controlled. To investigate the invariance of item difficulty hierarchy, a two-way ANOVA was computed on the standardized residuals. [16, 17] Significant diagnostic main effects represented group differences in item difficulty hierarchy.

### Analysis process

A co-calibration of the ABILHAND data of all diagnostic groups was performed, and subject responses (n=732) to the 83 items were analysed together. Items that presented an ordered rating scale and fit a unidimensional construct were then selected according to previously described methodology.[7-9] Items presenting a DIF among diagnoses were then split into as many disease-specific items as there were diagnostic groups responding to these items.[15] A principal component analysis (PCA) was subsequently performed to identify disease-specific patterns of item difficulty. Based upon PCA results, the DIF items were split into two main diagnostic groups: asymmetric disorders (CS and CP) and symmetric disorders (RA, SSc, NMD). Successive analyses were then performed to remove items with disordered thresholds, misfit items, and items that did not share a common location between the diagnostic groups. So, a generic co-calibrated scale was created to compare manual ability among diagnostic groups using a Kruskal-Wallis ANOVA of ranks and Dunn’s method for pair-wise multiple comparisons. Finally, the metric properties of the generic scale were compared with ABILHAND disease-specific scale properties.

## RESULTS

### Invariance of manual ability

Thirty-two of the initial 83 items were deleted due to the unidimensionality requirement violation. Assessment of invariance from the remaining 51 unidimensional items showed that 13 items shared a common location between diagnostic groups. Thirty-eight items presented a DIF and were split into a total of 152 items with diagnosis-specific locations. Differences between item difficulty specific to each diagnostic group and the mean item difficulty for all diagnoses were computed to identify disease-specific patterns of item difficulty. Positive values indicated that the items were more difficult for a particular diagnosis than average while negative values indicated that they were easier than average (Figure 1). With respect to disease-specific item difficulties, bimanual activities, such as “spreading butter on a slice of bread,” presented a greater challenge for patients with asymmetric disorders (CS and CP) than for patients with symmetric diagnoses (RA, SSc, NMDc, NMDa). Conversely, unimanual activities, such as “turning off a tap,” were perceived as easier in asymmetric disordered patients. About 85% of the DIF items were related to the unimanual or bimanual nature of the activities.

In addition, we found that proximal activities, such as “ringing a door bell,” were categorized as more difficult for NMD, CP, and CS patients compared to RA and SSc patients. In contrast, digital activities, such as “counting banknotes,” presented the greatest challenge for SSc subjects who primary had a distal impairment. Approximately one third of the DIF items were concerned with the proximal or distal nature of the activities. It should be noted that some items fit both criteria. Moreover, DIF activities were related, to a lesser extent, to other factors such as age (about 30% of the items) or mechanical constraints induced in the upper limb joints (about 10–15% of the items).

## PCA of differences between diagnosis-specific difficulty of split DIF items and average item difficulty

PCA results showed that 57% of the variance between diagnostic groups was explained by the symmetric or asymmetric nature of the disorders (Figure 2). Indeed, CS adults and CP children were located at one extremity of the first PCA component while diagnostic groups with symmetric disorders were located at the other extremity. The second PCA component explained 28% of the variance between diagnostic groups and distinguished patients expressing greater difficulties with proximal activities, such as NMD and CP, from more distal disorders such as SSc.

Based upon PCA results, the DIF items were split into two main diagnostic groups: asymmetric (CS and CP) and symmetric (RA, SSc, NMD) disorders. When the 13 items sharing a common location between diagnostic groups were co-calibrated with the 38 DIF items split into a total of 75 items (one item was responded neither by CS nor CP subjects) with locations specific to either asymmetric or symmetric disorders, 2 items with disordered thresholds, 7 misfitting items, and 27 remaining DIF items were removed. The resulting 52-item generic scale included 11 items sharing a common location between diagnostic groups and 41 items with locations specific to asymmetric (27 items) or symmetric (14 items) disorders. The 52 items are listed in Table 2 in order of decreasing difficulty (range: 3.60 to -3.93 logits).

**Table 2. Final calibration of the six diagnostic groups after the splitting of the DIF items into 2 main groups: asymmetric disorders (CS, CP) and symmetric disorders (RA, SSc, NMDc, NMDa)**

| Item                                                | Hands involvement | Responded by |    |    |     |      |      | Difficulty* (Logits) | SE (Logits) |
|-----------------------------------------------------|-------------------|--------------|----|----|-----|------|------|----------------------|-------------|
|                                                     |                   | CS           | CP | RA | SSc | NMDc | NMDa |                      |             |
| a01 Hammering a nail                                | 2C                | x            |    |    |     |      |      | 3.60                 | 0.23        |
| a02 Cutting one's nails                             | 2C                | x            | x  |    |     |      |      | 3.32                 | 0.15        |
| a03 Threading a needle                              | 2C                | x            |    |    |     |      |      | 3.31                 | 0.23        |
| a04 Peeling potatoes with a knife                   | 2C                | x            |    |    |     |      |      | 3.28                 | 0.23        |
| a05 Wrapping up gifts                               | 2C                | x            |    |    |     |      |      | 3.20                 | 0.25        |
| a06 Filing one's nails                              | 2C                | x            |    |    |     |      |      | 2.82                 | 0.21        |
| a07 Peeling onions                                  | 2C                | x            |    |    |     |      |      | 2.67                 | 0.24        |
| s08 Shelling hazel nuts                             | 2C                |              |    | x  | x   |      |      | 2.38                 | 0.14        |
| a08 Shelling hazel nuts                             | 2C                | x            |    |    |     |      |      | 2.23                 | 0.24        |
| a09 Winding up a wristwatch                         | 2B                | x            |    |    |     |      |      | 2.08                 | 0.20        |
| a10 Using a screwdriver                             | 2B                | x            |    |    |     |      |      | 2.04                 | 0.22        |
| s01 Hammering a nail                                | 2C                |              |    | x  | x   |      |      | 1.88                 | 0.15        |
| s11 Taking the cap off a bottle                     | 2B                |              |    | x  | x   |      | x    | 1.84                 | 0.12        |
| a12 Tightening a nut                                | 2B                | x            |    |    |     |      |      | 1.81                 | 0.25        |
| s04 Peeling potatoes with a knife                   | 2C                |              |    | x  | x   |      | x    | 1.56                 | 0.12        |
| a13 Sharpening a pencil                             | 2C                | x            | x  |    |     |      |      | 1.31                 | 0.16        |
| a11 Taking the cap off a bottle                     | 2B                | x            |    |    |     |      |      | 1.09                 | 0.23        |
| s07 Peeling onions                                  | 2C                |              |    | x  | x   |      |      | 0.91                 | 0.14        |
| a14 Spreading butter on a slice of bread            | 2B                | x            | x  |    |     |      |      | 0.74                 | 0.16        |
| b15 Fastening a snap (eg, jacket, bag)              | 2A                | x            | x  | x  | x   | x    | x    | 0.68                 | 0.09        |
| a16 Replacing a light bulb                          | 2B                | x            |    |    |     |      |      | 0.59                 | 0.30        |
| s06 Filing one's nails                              | 2C                |              |    | x  | x   |      |      | 0.59                 | 0.14        |
| s16 Replacing a light bulb                          | 2B                |              |    | x  | x   |      |      | 0.48                 | 0.15        |
| s05 Wrapping up gifts                               | 2C                |              |    | x  | x   |      |      | 0.46                 | 0.15        |
| a17 Opening mail                                    | 2B                | x            | x  |    |     |      |      | 0.41                 | 0.16        |
| a18 Handling a stapler                              | 2A                | x            |    |    |     |      |      | 0.19                 | 0.30        |
| b19 Peeling a banana                                | 2B                |              | x  |    |     | x    |      | -0.19                | 0.15        |
| b20 Filling a glass with water                      | 2A                |              | x  |    |     | x    | x    | -0.20                | 0.12        |
| b21 Opening a pack of biscuits                      | 2B                |              | x  |    |     | x    | x    | -0.20                | 0.13        |
| s22 Turning on a tap                                | 1                 |              |    |    |     | x    | x    | -0.21                | 0.15        |
| b23 Opening a car door                              | 1                 |              | x  |    | x   |      |      | -0.48                | 0.15        |
| a24 Opening a bread box                             | 2A                |              | x  |    |     |      |      | -0.56                | 0.22        |
| s25 Picking up a can                                | 1                 |              |    | x  | x   | x    | x    | -0.93                | 0.12        |
| b26 Throwing a ball                                 | 1                 |              | x  |    |     | x    |      | -0.99                | 0.16        |
| b27 Brushing one's hair                             | 1                 |              | x  | x  | x   | x    |      | -1.20                | 0.13        |
| a28 Unwrapping candy                                | 2C                |              | x  |    |     |      |      | -1.20                | 0.23        |
| a22 Turning on a tap                                | 1                 |              | x  |    |     |      |      | -1.41                | 0.26        |
| b29 Washing one's face                              | 1                 |              | x  | x  | x   | x    |      | -1.63                | 0.14        |
| a30 Placing a glass of water on a table             | 1                 |              | x  | x  |     |      |      | -1.70                | 0.22        |
| s31 Dealing cards                                   | 2B                |              |    |    |     | x    |      | -1.80                | 0.25        |
| a32 Drinking a glass of water                       | 1                 |              | x  | x  |     |      |      | -1.87                | 0.25        |
| a33 Handling a 4-colour ballpoint pen with one hand | 1                 |              | x  |    |     |      |      | -2.02                | 0.37        |
| a34 Counting banknotes                              | 2A                |              | x  |    |     |      |      | -2.20                | 0.29        |
| b35 Turning on a radio                              | 1                 |              | x  |    | x   | x    | x    | -2.28                | 0.18        |
| a36 Wiping one's hands                              | 2A                |              | x  |    |     |      |      | -2.32                | 0.26        |
| s37 Using a fork                                    | 1                 |              | x  |    |     | x    | x    | -2.51                | 0.21        |
| s38 Turning on a television                         | 1                 |              |    | x  | x   | x    | x    | -2.56                | 0.18        |
| b39 Piling up Lego® blocks                          | 2A                |              | x  |    |     | x    |      | -2.74                | 0.21        |
| b40 Using a spoon                                   | 1                 |              | x  |    | x   | x    |      | -3.35                | 0.17        |
| a38 Turning on a television                         | 1                 |              | x  | x  |     |      |      | -3.43                | 0.38        |
| a41 Turning off a tap                               | 1                 |              | x  |    |     |      |      | -3.54                | 0.56        |
| s42 Blowing one's nose                              | 1                 |              |    | x  | x   |      |      | -3.93                | 0.23        |

\* higher logit values indicate a greater manual ability for more difficult activities.

a: asymmetric disorders (CS, CP); s: symmetric disorders (RA, SSc, NMDc, NMDa); b: both symmetric and asymmetric disorders; 1 indicates unimanual activities; 2 indicates bimanual activities manageable in several unimanual steps (2A); requiring stabilization with one hand and digital activity with the other (2B); requiring digital activity from both hands (2C). CS: chronic stroke; CP: cerebral palsy; RA: rheumatoid arthritis; SSc: systemic sclerosis; NMDc: neuromuscular children; NMDa: neuromuscular adults; SE: standard error.

1  
2  
3 Hand involvement, whether particular groups responded to each item, and item difficulty with  
4 standard errors (mean: 0.20 logits; range: 0.09 to 0.56 logits) are also reported. It should be  
5 noted that only one diagnostic group responded to 21 items (40%) of the generic scale, while  
6 two or three diagnostic groups responded to as many as 12 items (23%). All diagnostic groups  
7 responded to the item, “Fastening a snap (e.g., jacket, bag).” The person separation reliability  
8 of the generic scale was 0.93, indicating that 5.19 strata of manual ability can be distinguished  
9 in our sample. The average measure of the entire sample was 2.34 logits indicating that the  
10 patients’ ability level exceeded the scale average difficulty.

### 21 **Manual ability across diagnostic groups**

22 Figure 3 shows the distribution of manual ability across the six diagnostic groups. Significant  
23 differences in manual ability measures were observed among diagnoses ( $p < 0.001$ ). The CP  
24 and NMDc groups had significantly less manual ability than the RA group, who in turn had  
25 less manual ability than CS, SSc and NMDa patients ( $p < 0.05$ , Dunn’s pair-wise  
26 comparisons).

### 34 **Comparison of the generic and disease-specific scales**

35 As reported in Table 3, standard errors of patient locations were greater for the generic scale  
36 than for disease-specific scales, and a smaller range of patient measures was observed in the  
37 generic scale. The generic scale is globally less accurate than the disease-specific scales  
38 leading to a higher number of extreme persons. In addition, Table 3 shows that manual ability  
39 measures of generic and disease-specific scales were highly correlated (range: 0.94–0.97).  
40  
41  
42  
43  
44  
45  
46  
47  
48  
49  
50  
51  
52  
53  
54  
55  
56  
57  
58  
59  
60

Table 3. Comparison of generic and disease-specific scales

| Diagnostic group | Generic scale                  |                            |                      | Disease-specific scales        |                            |                      | Relationship between the measures of generic and disease-specific scales<br>R (p-value) |
|------------------|--------------------------------|----------------------------|----------------------|--------------------------------|----------------------------|----------------------|-----------------------------------------------------------------------------------------|
|                  | Median SE of measures (logits) | Range of measures (logits) | Extreme subjects (%) | Median SE of measures (logits) | Range of measures (logits) | Extreme subjects (%) |                                                                                         |
| CS               | 0.50                           | 7.06                       | 11                   | 0.46                           | 8.56                       | 08                   | 0.95 (< 0.001)                                                                          |
| CP               | 0.53                           | 10.87                      | 09                   | 0.49                           | 11.98                      | 11                   | 0.95 (< 0.001)                                                                          |
| RA               | 0.61                           | 8.27                       | 09                   | 0.44                           | 8.68                       | 09                   | 0.96 (< 0.001)                                                                          |
| SSc              | 0.66                           | 8.45                       | 21                   | 0.46                           | 10.64                      | 12                   | 0.95 (< 0.001)                                                                          |
| NMDc             | 0.70                           | 6.78                       | 23                   | 0.53                           | 8.12                       | 15                   | 0.94 (< 0.001)                                                                          |
| NMDa             | 1.08                           | 10.48                      | 40                   | 0.70                           | 11.14                      | 31                   | 0.97 (< 0.001)                                                                          |

CS: chronic stroke; CP: cerebral palsy; RA: rheumatoid arthritis; SSc: systemic sclerosis; NMDc: neuromuscular children; NMDa: neuromuscular adults; SE: standard error associated to subjects' measure; R: Pearson correlation.

## DISCUSSION

The present study investigated the applicability of a generic manual ability scale unbiased by diagnosis across six populations. We analysed previous subject responses gathered during calibrations of disease-specific ABILHAND questionnaires, and we examined similarities and differences in manual ability among diagnostic groups. A unidimensional scale was constructed with 11 items sharing a common location between diagnostic groups and 41 items having a location specific to asymmetric (CS and CP) or symmetric (NMD, RA, and SSc) disorders. The resulting generic scale revealed that CP and NMD children had significantly less manual ability than RA patients, who in turn had significantly less manual ability than CS, SSc, and NMD adults.

A generic manual ability scale should best meet the requirements of upper limb rehabilitation, insofar as a common instrument with a diagnosis-independent calibration can be used across clinical settings. Of course, use of a generic scale assumes that individuals achieving identical activities have the same manual ability level regardless of their diagnosis. However, this assumption may not hold true in clinical practice. For example, we found that only 11 out of 52 items had difficulties unbiased by diagnosis. Our results differ from those of Simone et al., [18] who found that the 23 CS-specific ABILHAND item scale “can be routinely applied to a variety of motor impairments.” These authors argue that the item hierarchy can be



1  
2  
3 successfully preserved across diagnoses. Using our patient responses, we conducted a  
4  
5 comparable analysis on the same 23 items from the CS-specific ABILHAND scale as Simone  
6  
7 et al.[18] Our findings showed that 21 items (91%) presented a significant DIF, which  
8  
9 contrasts with the apparent invariance reported by Simone et al.[18] Two factors may  
10  
11 contribute to the observed differences in results: sample size and case mix. Our sample  
12  
13 included 732 patients, which is significantly more than the 150 subjects in the Simone et al.  
14  
15 study.[18] At least 200 subjects are required to detect uniform DIF with adequate power (>  
16  
17 80%).[19] In addition, the unbalanced case mix in the Simone et al.[18] project (83 CS, 17  
18  
19 multiple sclerosis, 13 ataxia, 10 tetraplegics, 3 Parkinson's disease, and 24 healthy controls)  
20  
21 may have concealed possible disease influences on difficulty ratings. Taken together, these  
22  
23 findings indicate that individuals' underlying diseases or disorders may differentially  
24  
25 influence the difficulty of manual activities.  
26  
27

28  
29 An explicit construct theory initiated the development of disease-specific ABILHAND scales.  
30  
31 For each diagnosis, the scale content was selected to delineate a single unidimensional  
32  
33 construct, correlated to the patients' functional, clinical, and demographic characteristics.[5-9]  
34  
35 The nature of the measured variable, namely manual ability, can be determined by  
36  
37 investigating the factors contributing to the hierarchy of manual item difficulty that is  
38  
39 observed across diagnoses. To address this issue, we developed an original methodology that  
40  
41 combines DIF tests, PCA, and manual activities categorization about their nature. Although  
42  
43 an activity is expressed in the same way for all patients, its perceived difficulty may vary  
44  
45 according to one's disease or disorder and the specificity of underlying motor impairments.  
46  
47 Indeed, various studies show that manual activity limitations are partially related to  
48  
49 underlying hand impairments.[5, 20]  
50  
51

52  
53 The current PCA results suggest that the vast majority (85%) of the difficulty variations  
54  
55 observed in manual activities across diagnostic groups was explained by two characteristics:  
56  
57  
58  
59  
60

1  
2  
3 1) the symmetric or asymmetric nature of the disorder (57% of the variance), and 2) the  
4 proximal or distal nature of the disorder (28% of the variance). For example, activities  
5 requiring greater bimanual involvement (e.g., “peeling potatoes with a knife”) tended to be  
6 rated as more difficult by patients with asymmetric disorders (CP children and CS adults) than  
7 by patients with more symmetric disorders (RA, SSc, NMDc, NMDa). On the other hand,  
8 unimanual activities (e.g., “turning on a television”) or bimanual activities manageable in  
9 several unimanual steps (e.g., “handling a stapler”) were rated as less difficult for patients  
10 with asymmetric disorders, likely because these activities can be achieved by exclusively  
11 using the unaffected or less affected hand.[6, 21] Activities involving the shoulder (e.g.,  
12 “drinking a glass of water”) were generally more difficult for NMD and CP patients. Indeed,  
13 the NMD groups included several diseases in which proximal segments were more likely to  
14 be affected than distal ones (e.g., Duchenne/limb girdle muscular dystrophy, facio-scapulo-  
15 humeral dystrophy, spinal muscular atrophy).[9] Moreover, and contrary to other diagnoses,  
16 NMD and CP groups included subjects in a wheelchair, which may prevent the achievement  
17 of activities such as, “ringing a door bell”, or “replacing a light bulb”. In contrast, digital  
18 activities (e.g. “winding up a wristwatch”) were particularly difficult for SSc subjects, who  
19 have reduced digital dexterity.[8]

20  
21  
22  
23  
24  
25  
26  
27  
28  
29  
30  
31  
32  
33  
34  
35  
36  
37  
38  
39  
40  
41  
42  
43  
44  
45  
46  
47  
48  
49  
50  
51  
52  
53  
54  
55  
56  
57  
58  
59  
60

The strong correlations ( $R \geq 0.94$ ) observed between the generic scale and each of the  
disease-specific ABILHAND scales supported the assertion that these instruments  
successfully measure manual ability. Overall, children had less manual ability than adults.  
This finding is consistent with previous results[22, 23] showing that children have relatively  
greater difficulty with manipulation activities than adults.

In our study, the generic scale was globally less accurate than the disease-specific scales,  
which often included a greater number of disease-relevant activities. Overall, our findings are  
consistent with several studies showing that disease-specific instruments are substantially

1  
2  
3 more discriminative and responsive to small deficits than generic instruments.[24, 25]  
4  
5 Consequently, this increased sensitivity allows for the detection and quantification of small,  
6  
7 yet clinically significant health changes.[10, 11] For example, ABILHAND disease-specific  
8  
9 scales should be used to determine pathology impacts on manual ability, to measure clinical  
10  
11 changes consecutive to specific treatments, and to tailor interventions to the specific needs of  
12  
13 individuals with a particular diagnosis. All of these concerns are important for patients and  
14  
15 clinicians in their daily practice. In contrast, generic scales may identify the relative burden of  
16  
17 diagnoses, compare various health-care programs, and demonstrate evidence of cost-  
18  
19 effectiveness of different healthcare interventions[10, 11, 26] Thus, each type of scale has  
20  
21 clinical value and provides unique information corresponding to specific objectives.[27]  
22  
23 In conclusion, the present study proposed an original methodology combining DIF tests with  
24  
25 a splitting procedure and PCA to better understand the nature of manual ability. Our results  
26  
27 showed that scale content and item type remained the same among diagnostic groups;  
28  
29 however, item difficulty changed depending on patient diagnosis. The ABILHAND scale  
30  
31 centres on the individual and his/her impairments, adaptive strategies, environmental, and  
32  
33 personal factors. Thus, it is not surprising that disease characteristics contribute to the  
34  
35 difficulties experienced in performing manual activities, such that manual ability level change  
36  
37 will differ between patients with different diagnoses even if exactly the same activities show  
38  
39 similar improvement. Our finding that item difficulties were disease-dependent emphasizes  
40  
41 the danger of using generic scales without prior investigation of item invariance across  
42  
43 diagnostic groups.  
44  
45  
46  
47  
48

49 Nevertheless, using 11 linked items unbiased by diagnosis, we successfully constructed a  
50  
51 unidimensional scale common to six diagnostic groups by separating asymmetric from  
52  
53 symmetric disorders. This new generic scale that allows the manual ability of patients with  
54  
55 different diagnoses to be compared may be used to examine cost-effectiveness of health  
56  
57  
58  
59  
60

1  
2  
3 interventions across a variety of diseases and disorders. However, ABILHAND disease-  
4  
5 specific scales should be preferred in daily clinical settings for treatment, planning and  
6  
7 follow-up of patients.  
8  
9  
10  
11  
12  
13  
14  
15  
16  
17  
18  
19  
20  
21  
22  
23  
24  
25  
26  
27  
28  
29  
30  
31  
32  
33  
34  
35  
36  
37  
38  
39  
40  
41  
42  
43  
44  
45  
46  
47  
48  
49  
50  
51  
52  
53  
54  
55  
56  
57  
58  
59  
60

For peer review only

## COMPETING INTERESTS

None declared.

## FUNDING

This research received no specific grant from any funding agency in the public, commercial or not-for-profit sectors.

## CONTRIBUTORSHIP STATEMENT

CA performed the statistical analyses, conducted the literature search, and drafted the manuscript. CA, LV, and MP participated in the data collection. CA, LV, MP, and JLT contributed to the study design and the data analysis. All authors participated in the data interpretation, critically revised the draft of the manuscript for important intellectual content, and contributed to the writing. All authors have read and approved the final manuscript.

## DATA SHARING STATEMENT

Dataset is available from the corresponding author at [carlyne.arnould@gmail.com](mailto:carlyne.arnould@gmail.com)

## REFERENCES

1. Grimby G, Tennant A, Tesio L. The use of raw scores from ordinal scales: time to end malpractice? *J Rehabil Med* 2012;**44**:97–8.
2. Merbitz C, Morris J, Grip JC. Ordinal scales and foundations of misinference. *Arch Phys Med Rehabil* 1989;**70**:308–12.
3. Wright BD, Linacre JM. Observations are always ordinal; measurement, however, must be interval. *Arch Phys Med Rehabil* 1989;**70**:857–60.
4. Rasch G. *Probabilistic models for some intelligence and attainment tests*. Chicago: Mesa Press, 1980.
5. Penta M, Tesio L, Arnould C, *et al*. The ABILHAND questionnaire as a measure of manual ability in chronic stroke patients: Rasch-based validation and relationship to upper limb impairment. *Stroke* 2001;**32**:1627–34.
6. Arnould C, Penta M, Renders A, *et al*. ABILHAND-Kids: a measure of manual ability in children with cerebral palsy. *Neurology* 2004;**63**:1045–52.
7. Durez P, Fraselle V, Houssiau F, *et al*. Validation of the ABILHAND questionnaire as a measure of manual ability in patients with rheumatoid arthritis. *Ann Rheum Dis* 2007;**66**:1098–105.
8. Vanthuyne M, Smith V, Arat S, *et al*. Validation of a manual ability questionnaire in patients with systemic sclerosis. *Arthritis Rheum* 2009;**61**:695–703.
9. Vandervelde L, Van den Bergh PY, Penta M, *et al*. Validation of the ABILHAND questionnaire to measure manual ability in children and adults with neuromuscular disorders. *J Neurol Neurosurg Psychiatry* 2010;**81**:506–12.
10. Patrick DL, Deyo RA. Generic and disease-specific measures in assessing health status and quality of life. *Med Care* 1989;**27**(3 Suppl):217–32S.

- 1  
2  
3 11. Marra CA, Woolcott JC, Kopec JA, *et al.* A comparison of generic, indirect utility  
4  
5 measures (the HUI2, HUI3, SF-6D, and the EQ-5D) and disease-specific instruments (the  
6  
7 RAQol and the HAQ) in rheumatoid arthritis. *Soc Sci Med* 2005;**60**:1571–82.
- 8  
9  
10 12. Haigh R, Tennant A, Biering-Sorensen F, *et al.* The use of outcome measures in physical  
11  
12 medicine and rehabilitation within Europe. *J Rehabil Med* 2001;**33**:273–8.
- 13  
14 13. Tennant A, McKenna SP, Hagell P. Application of Rasch analysis in the development and  
15  
16 application of quality of life instruments. *Value Health* 2004; **7**(Suppl 1):22–6.
- 17  
18 14. Holland PW, Wainer H. *Differential Item Functioning*. Hillsdale, New Jersey: Lawrence  
19  
20 Erlbaum, 1993.
- 21  
22 15. Tennant A, Penta M, Tesio L, *et al.* Assessing and adjusting for cross-cultural validity of  
23  
24 impairment and activity limitation scales through differential item functioning within the  
25  
26 framework of the Rasch model: the PRO-ESOR project. *Med Care* 2004;**42**(1 Suppl): 37–  
27  
28 48S.
- 29  
30 16. RUMM Laboratory. *Interpreting RUMM2020: Part 1, dichotomous data*. Perth, Western  
31  
32 Australia: RUMM Laboratory, 2004.
- 33  
34 17. RUMM Laboratory. *Interpreting RUMM2020: Part 2, polytomous data*. Perth, Western  
35  
36 Australia: RUMM Laboratory, 2004.
- 37  
38 18. Simone A, Rota V, Tesio L, *et al.* Generic ABILHAND questionnaire can measure  
39  
40 manual ability across a variety of motor impairments. *Int J Rehabil Res* 2011;**34**:131–40.
- 41  
42 19. Scott NW, Fayers PM, Aaronson NK, *et al.* Differential item functioning (DIF) analyses  
43  
44 of health-related quality of life instruments using logistic regression. *Health Qual Life*  
45  
46 *Outcomes* 2010;**8**:81.
- 47  
48 20. Arnould C, Penta M, Thonnard J-L. Hand impairments and their relationship with manual  
49  
50 ability in children with cerebral palsy. *J Rehabil Med* 2007;**39**:708–14.
- 51  
52  
53  
54  
55  
56  
57  
58  
59  
60

- 1  
2  
3 21. Sakzewski L, Ziviani J, Boyd R. The relationship between unimanual capacity and  
4  
5 bimanual performance in children with congenital hemiplegia. *Dev Med Child Neurol*  
6  
7 2010;**52**:811–6.  
8  
9  
10 22. Haley SM, Ludlow LH. Applicability of the hierarchical scales of the Tufts Assessment of  
11  
12 Motor Performance for school-aged children and adults with disabilities. *Phys Ther*  
13  
14 1992;**72**:191–202.  
15  
16 23. van Eck M, Dallmeijer AJ, van Lith IS, *et al.* Manual ability and its relationship with daily  
17  
18 activities in adolescents with cerebral palsy. *J Rehabil Med* 2010;**42**:493–8.  
19  
20  
21 24. Murawski MM, Miederhoff PA. On the generalizability of statistical expressions of health  
22  
23 related quality of life instrument responsiveness: a data synthesis. *Qual Life Res*  
24  
25 1998;**7**:11–22.  
26  
27 25. Wiebe S, Guyatt G, Weaver B, *et al.* Comparative responsiveness of generic and specific  
28  
29 quality-of-life instruments. *J Clin Epidemiol* 2003;**56**:52–60.  
30  
31  
32 26. Mazur W, Kupiainen H, Pitkaniemi J, *et al.* Comparison between the disease-specific  
33  
34 Airways Questionnaire 20 and the generic 15D instruments in COPD. *Health Qual Life*  
35  
36 *Outcomes* 2011;**9**:4.  
37  
38 27. Le Pen C, Lévy E, Loos F, *et al.* “Specific” scale compared with “generic” scale: a double  
39  
40 measurement of the quality of life in a French community sample of obese subjects. *J*  
41  
42 *Epidemiol Community Health* 1998;**52**:445–50.  
43  
44  
45  
46  
47  
48  
49  
50  
51  
52  
53  
54  
55  
56  
57  
58  
59  
60



## FIGURE LEGENDS

**Figure 1.** Disease-specific patterns of item difficulty according to the bimanual or proximal nature of the activities showing a Differential Item Functioning. Differences between item difficulty ratings specific to each diagnostic group ( $\delta_{\text{specific}}$ ) and the average item difficulty for all diagnoses ( $\delta_{\text{mean}}$ ) are shown for each disorder (CS = chronic stroke; CP = cerebral palsy; RA = rheumatoid arthritis; SSc = systemic sclerosis; NMDc = neuromuscular children; and NMDa = neuromuscular adults). Boxes indicate the 25% and 75% limits (the interquartile range); the vertical line inside each box indicates the median; vertical bars outside each box indicate the 10% and 90% limits and dots indicate the 5% and 95% outliers.

**Figure 2.** PCA results based upon differences between disease-specific difficulty of the split DIF items and the average item difficulty across all diagnoses. CP = cerebral palsy; NMDc = neuromuscular children; RA = rheumatoid arthritis; SSc = systemic sclerosis; and NMDa = neuromuscular adults. CS = chronic stroke;

**Figure 3.** Box plots showing the distribution of manual ability measures for each diagnosis. Boxes indicate the 25% and 75% limits (the interquartile range); the vertical line inside each box indicates the median; vertical bars outside each box indicate the 10% and 90% limits and dots indicate the 5% and 95% outliers. CP = cerebral palsy; NMDc = neuromuscular children; RA = rheumatoid arthritis; NMDa = neuromuscular adults; SSc = systemic sclerosis; and CS = chronic stroke.

Figure 1

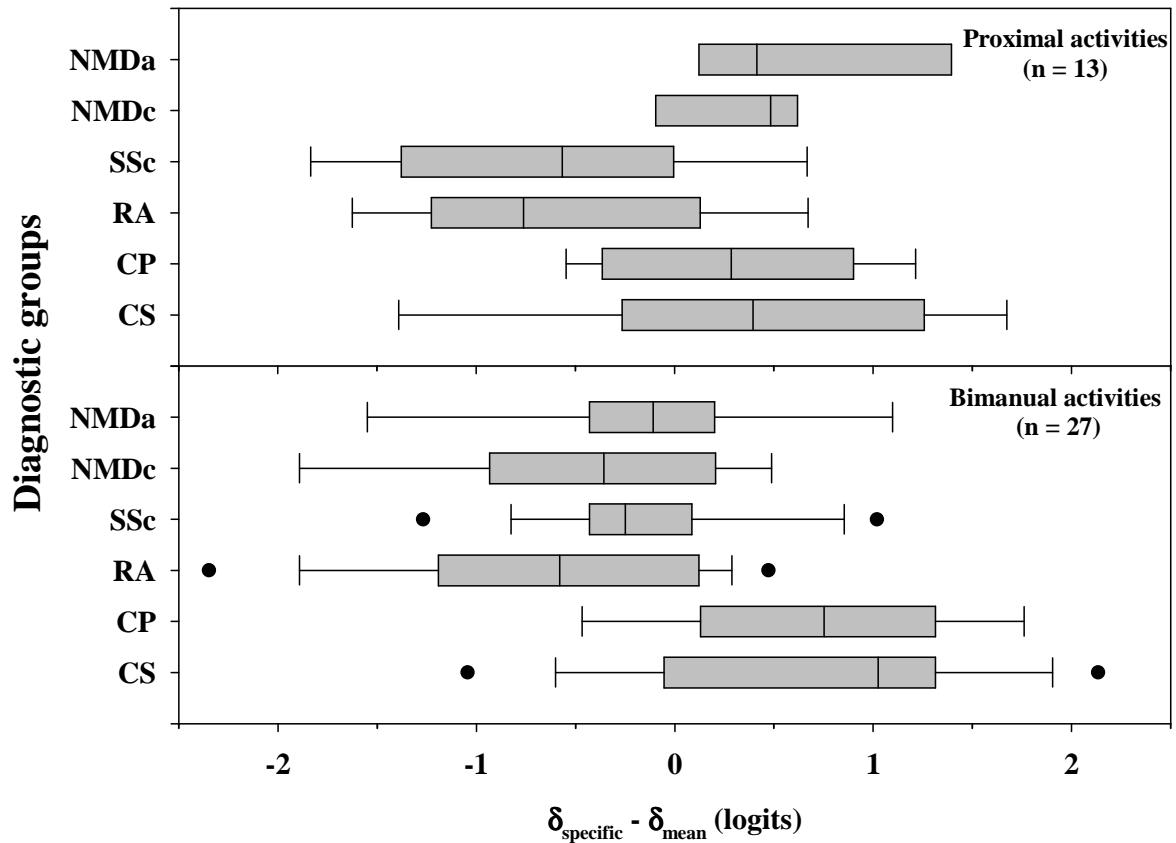

Figure 2

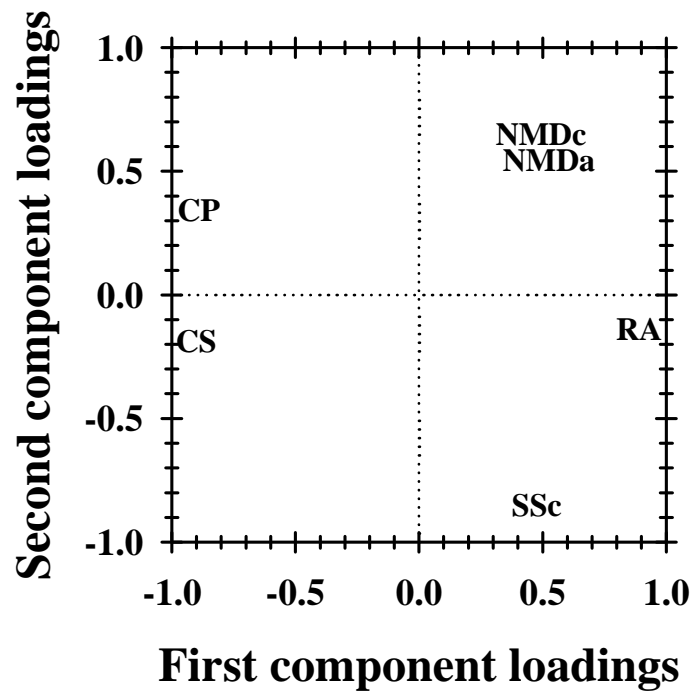

Figure 3

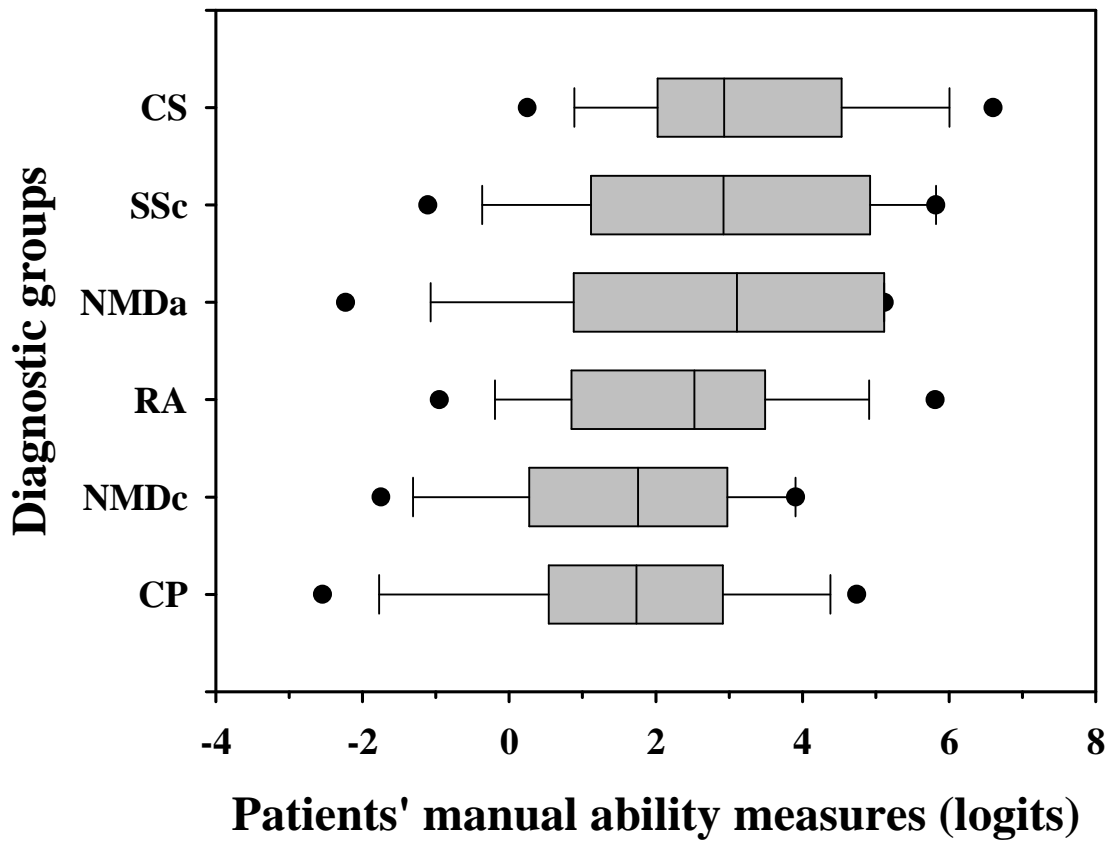

view only

1  
2  
3  
4  
5  
6  
7  
8  
9  
10  
11  
12  
13  
14  
15  
16  
17  
18  
19  
20  
21  
22  
23  
24  
25  
26  
27  
28  
29  
30  
31  
32  
33  
34  
35  
36  
37  
38  
39  
40  
41  
42  
43  
44  
45  
46  
47  
48  
49  
50  
51  
52  
53  
54  
55  
56  
57  
58  
59  
60



**Can manual ability be measured with a generic ABILHAND scale? A cross-sectional study conducted on six diagnostic groups**

|                                 |                                                                                                                                                                                                                                                                                                                                                                                                                                      |
|---------------------------------|--------------------------------------------------------------------------------------------------------------------------------------------------------------------------------------------------------------------------------------------------------------------------------------------------------------------------------------------------------------------------------------------------------------------------------------|
| Journal:                        | <i>BMJ Open</i>                                                                                                                                                                                                                                                                                                                                                                                                                      |
| Manuscript ID:                  | bmjopen-2012-001807.R1                                                                                                                                                                                                                                                                                                                                                                                                               |
| Article Type:                   | Research                                                                                                                                                                                                                                                                                                                                                                                                                             |
| Date Submitted by the Author:   | 19-Sep-2012                                                                                                                                                                                                                                                                                                                                                                                                                          |
| Complete List of Authors:       | Arnould, Carlyne; Haute Ecole Louvain en Hainaut, Physical and Occupational Therapy Departments<br>Vandervelde, Laure; Institut Parnasse Deux-Alice, Physical Therapy Department<br>Batcho, Charles; Université catholique de Louvain, Institute of Neuroscience<br>Penta, Massimo; Université catholique de Louvain, Institute of Neuroscience<br>Thonnard, Jean-Louis; Université catholique de Louvain, Institute of Neuroscience |
| <b>Primary Subject Heading</b>: | Rehabilitation medicine                                                                                                                                                                                                                                                                                                                                                                                                              |
| Secondary Subject Heading:      | Paediatrics, Cardiovascular medicine                                                                                                                                                                                                                                                                                                                                                                                                 |
| Keywords:                       | REHABILITATION MEDICINE, Adult neurology < NEUROLOGY, Paediatric neurology < NEUROLOGY, Neuromuscular disease < NEUROLOGY, Hand & wrist < ORTHOPAEDIC & TRAUMA SURGERY                                                                                                                                                                                                                                                               |
|                                 |                                                                                                                                                                                                                                                                                                                                                                                                                                      |

SCHOLARONE™  
Manuscripts

**ARTICLE TITLE:**

Can manual ability be measured with a generic ABILHAND scale? A cross-sectional study conducted on six diagnostic groups

**AUTHORS:**

Carlyne Arnould<sup>1</sup> (PhD), Laure Vandervelde<sup>2</sup> (PhD), Charles Sèbiyo Batcho<sup>3</sup> (PT), Massimo Penta<sup>3</sup> (PhD), Jean-Louis Thonnard<sup>3</sup> (PhD)

1 Physical and Occupational Therapy Departments, Paramedical Category, Haute Ecole Louvain en Hainaut, Montignies-sur-Sambre, Belgium

2 Physical Therapy Department, Institut Parnasse Deux-Alice, Haute Ecole Leonard de Vinci, Brussels, Belgium

3 Institute of Neuroscience, Université catholique de Louvain, Brussels, Belgium

**CORRESPONDING AUTHOR:**

Dr. Carlyne Arnould

Physical and Occupational Therapy Departments

Paramedical Category

Haute Ecole Louvain en Hainaut

Rue Trieu Kaisin, 134

6061 Montignies-sur-Sambre

Belgium

Tel. + 32 498 59 31 33

E-mail. [carlyne.arnould@gmail.com](mailto:carlyne.arnould@gmail.com)

1  
2  
3  
4  
5 **KEYWORDS:** motor skills disorders, upper extremity, hand, activities of daily living,  
6  
7 questionnaires  
8  
9

## 10 11 **WORD COUNTS**

12  
13  
14 **The title includes 103 characters.**

15  
16 **The abstract includes 297 words.**

17  
18 **This manuscript includes 3 tables and 4 figures, 3994 words**  
19

## 20 21 22 **LIST OF TABLES**

23  
24  
25 Table 1. Sample characteristics (n = 732)

26  
27 Table 2. Final calibration of the six diagnostic groups after the splitting of the DIF items into  
28  
29 two main groups: asymmetric disorders (CS, CP) and symmetric disorders (RA, SSC, NMDc,  
30  
31 NMDa)  
32

33  
34 Table 3. Comparison of generic and disease-specific scales  
35  
36  
37

## 38 39 **LIST OF FIGURES**

40  
41 Figure 1. Flow diagram illustrating the analysis process steps.

42  
43 Figure 2. Disease-specific patterns of item difficulty according to the bimanual or proximal  
44  
45 nature of the activities showing a Differential Item Functioning  
46

47  
48 Figure 3. PCA results based upon differences between disease-specific difficulty of the split  
49  
50 DIF items and the average item difficulty across all diagnoses  
51

52  
53 Figure 4. Distribution of manual ability measures for each diagnosis  
54  
55  
56  
57  
58  
59  
60

**ABSTRACT**

**Objectives:** Several ABILHAND Rasch-built manual ability scales were previously developed for chronic stroke (CS), cerebral palsy (CP), rheumatoid arthritis (RA), systemic sclerosis (SSc), and neuromuscular disorders (NMD). The present study aimed to explore the applicability of a generic manual ability scale unbiased by diagnosis and to study the nature of manual ability across diagnoses.

**Design:** cross-sectional study.

**Setting:** outpatient clinic homes (CS, CP, RA), specialized centers (CP), reference centers (CP, NMD), and university hospitals (SSc).

**Participants:** 762 patients from six diagnostic groups: 103 CS adults, 113 CP children, 112 RA adults, 156 SSc adults, 124 NMD children and 124 NMD adults.

**Primary and secondary outcome measures:** manual ability as measured by the ABILHAND disease-specific questionnaires, diagnosis, and nature (i.e., uni- or bi-manual involvement and proximal or distal joints involvement) of the ABILHAND manual activities.

**Results:** The difficulty of most manual activities was diagnosis-dependent. A principal component analysis highlighted that 57% of the variance in the item difficulty between diagnoses was explained by the symmetric or asymmetric nature of the disorders. A generic scale was constructed, from a metric point of view, with 11 items sharing a common difficulty among diagnoses and 41 items displaying a category-specific location (asymmetric: CS, CP; and symmetric: RA, SSc, NMD). This generic scale showed that CP and NMD children had significantly less manual ability than RA patients, who had significantly less manual ability than CS, SSc, and NMD adults. However, the generic scale was less discriminative and responsive to small deficits than disease-specific instruments.

**Conclusions:** Our finding that most of the manual item difficulties were disease-dependent emphasizes the danger of using generic scales without prior investigation of item invariance



1  
2  
3 across diagnostic groups. Nevertheless, a generic manual ability scale could be developed by  
4  
5 adjusting and accounting for activities perceived differently in various disorders.  
6  
7  
8  
9  
10  
11  
12  
13  
14  
15  
16  
17  
18  
19  
20  
21  
22  
23  
24  
25  
26  
27  
28  
29  
30  
31  
32  
33  
34  
35  
36  
37  
38  
39  
40  
41  
42  
43  
44  
45  
46  
47  
48  
49  
50  
51  
52  
53  
54  
55  
56  
57  
58  
59  
60

For peer review only

## ARTICLE SUMMARY

### Article focus:

- To explore the applicability of a generic ABILHAND manual ability scale unbiased by diagnosis across various clinical populations.
- To analyse prior data from cross-sectional studies that developed disease-specific manual ability questionnaires in order to investigate the co-calibration of patient perceived item difficulty on a common metric.
- To better understand the nature of the measured variable, namely manual ability.

### Key messages:

- The difficulty of most manual activities was diagnosis-dependent, emphasizing the danger of using generic scales without prior investigation of item invariance across diagnostic groups.
- The vast majority (85%) of the difficulty variations observed in manual activities across diagnostic groups was explained by 1) the symmetric or asymmetric nature of the disorder (57% of the variance) and 2) the proximal or distal nature of the disorder (28% of the variance).
- Although less sensitive than diagnosis-specific scales, a generic manual ability scale could be developed by adjusting and accounting for activities perceived differently in various disorders, which allows quantitative comparisons of manual ability between diagnostic groups.

### Strengths and limitations of this study:

- Our study explores a large set of data (732 patients) spread out evenly over 6 diagnostic groups (stroke adults, cerebral palsy children, adults with rheumatoid arthritis, adults with systemic sclerosis, children and adults with neuromuscular disorders).

- 1  
2  
3  
4  
5  
6  
7  
8  
9  
10  
11  
12  
13  
14  
15  
16  
17  
18  
19  
20  
21  
22  
23  
24  
25  
26  
27  
28  
29  
30  
31  
32  
33  
34  
35  
36  
37  
38  
39  
40  
41  
42  
43  
44  
45  
46  
47  
48  
49  
50  
51  
52  
53  
54  
55  
56  
57  
58  
59  
60
- Our study proposes an original methodology (combining differential item functioning tests, principal component analysis, and manual activities categorization) that investigates the factors contributing to the hierarchy of manual item difficulty observed across diagnoses allowing the nature of manual ability to be better understood.

For peer review only

## INTRODUCTION

One fundamental goal of rehabilitation is to improve the subjects' ability to manage the daily activities necessary for autonomous living.[1] Such an ability belongs to the domain of latent variables concealed within the person, such as pain or intelligence. It cannot be observed directly, but it can be inferred from subject's perceived difficulty in performing activities, also called items, using patient self-reported questionnaires. Over the past decade, questionnaires have therefore become widely used as outcome measures in clinical trials[2] and rating scale data are becoming integral to patient care, prescribing, and policymaking. It is essential that functional rating scales provide scientifically robust and clinically meaningful results to ensure appropriate interpretations and decision-making regarding disease effects, clinical implications, treatment, health policies, and resource allocation. Unfortunately, most rating scales generate ordinal data by summing scores assigned to a set of items representing the intended variable, and metric properties of raw ordinal scores are known to have limited validity.[3, 4] In view of this limitation, the Rasch model[5] is becoming increasingly popular for health measurements because it enables the direct transformation from ordinal scores to linear measures with a constant unit.

Over the last 20 years, our research group has developed several manual ability rating scales (known under the umbrella term of ABILHAND questionnaires) by applying the Rasch model to various diagnostic groups. ABILHAND scales are self-administered questionnaires that measure "manual ability", which is defined as, "the capacity to manage daily activities requiring the use of the upper limbs, whatever the strategies involved".[6] Disease-specific manual ability "rulers" were previously developed for the following patient groups: chronic stroke (CS),[6] cerebral palsy (CP),[7] rheumatoid arthritis (RA),[8] systemic sclerosis (SSc),[9] and neuromuscular disorders (NMD).[10] Each ABILHAND scale has its own Rasch-derived item difficulty calibration, which defines a disease-specific manual ability

1  
2  
3 measurement continuum. ABILHAND questionnaires present good psychometric qualities,  
4 including linearity, unidimensionality, construct validity, and test-retest reliability.  
5  
6

7 Disease-specific scales, which are highly sensitive and detect small, yet clinically important  
8 changes, are frequently used in research because they ensure comprehensive assessment of  
9 health aspects directly related to the condition.[11, 12] In contrast, generic scales enable  
10 comparisons of various diagnoses and healthcare interventions, which may provide useful  
11 data for health policies, cost-effective analyses, and resource allocation.[11, 12] They best  
12 meet rehabilitation requirements when disability treatment is not dependent upon a specific  
13 underlying diagnosis. [13] For instance, as a single bathroom scale can be used to weigh all  
14 patients, a generic manual ability scale would enable quantitative comparisons of the ability to  
15 use the upper limbs in daily activities across patients of various diagnoses (and also with  
16 healthy subjects).  
17  
18  
19  
20  
21  
22  
23  
24  
25  
26  
27  
28

29 From a metric point of view, it is possible to co-calibrate various disease-specific  
30 ABILHAND questionnaire items on the same scale, provided that the scales are based on an  
31 identical unidimensional construct.[14] In theory, and similar to the graduations of a metric  
32 ruler, items should have the same difficulty for all diagnostic groups, regardless of the disease  
33 being measured. Nevertheless, the main implicit assumption made by the users of generic  
34 scales is that the difficulties of daily activities are invariant across diagnoses. However, in  
35 practice, item difficulty hierarchy may vary across groups, demonstrating Differential Item  
36 Functioning (DIF).[15] The Rasch model can be used to test the invariance of item difficulty  
37 hierarchy and to accommodate for DIF.[16] When the items of a generic scale are unstable  
38 across diagnoses, the measurements generated by them cannot be used to make meaningful  
39 comparisons.  
40  
41  
42  
43  
44  
45  
46  
47  
48  
49  
50  
51  
52

53 The present study explored the applicability of a generic ABILHAND manual ability scale,  
54 which is unbiased by diagnoses, across various clinical populations. Setting out this objective,  
55  
56  
57  
58  
59  
60

we also intended to improve the current understanding of the nature of manual ability and especially its interaction with diagnosis. We analysed prior data from cross-sectional studies that developed disease-specific manual ability questionnaires in order to investigate the co-calibration of patient perceived item difficulty on a common metric.

## METHODS

### Subjects

Data from 732 subjects, who previously provided informed consent, were analysed. Patients with the following disorders were evaluated: 103 CS adults,[6] 113 CP children,[7] 112 RA adults,[8] 156 SSc adults,[9] 124 NMD children (NMDc) and 124 NMD adults (NMDa).[10] Table 1 provides patient characteristics. The ethics committee of the Université catholique de Louvain, Faculty of Medicine in Brussels, Belgium, authorized and approved the study.

**Table 1. Sample characteristics (n = 732)**

| Variables                   | CS                       | CP                       | RA                                   | SSc                     | NMDc                                     | NMDa                                     |
|-----------------------------|--------------------------|--------------------------|--------------------------------------|-------------------------|------------------------------------------|------------------------------------------|
| <b>Number of subjects</b>   | 103                      | 113                      | 112                                  | 156                     | 124                                      | 124                                      |
| <b>Age, y, mean (range)</b> | 63 (24-84)               | 10 (6-15)                | 55 (25-82)                           | 54 (21-82)              | 10 (6-16)                                | 47 (16-80)                               |
| <b>Sex</b>                  |                          |                          |                                      |                         |                                          |                                          |
| <b>Males</b>                | 64                       | 67                       | 29                                   | 32                      | 84                                       | 69                                       |
| <b>Females</b>              | 39                       | 46                       | 83                                   | 124                     | 40                                       | 55                                       |
| <b>Diagnosis</b>            | R hemi: 55<br>L hemi: 48 | tetra: 35<br>di: 24      | No UL disorder: 20<br>DH disorder: 9 | lcSSc: 104<br>dcSSc: 33 | DMD/BMD or LGMD: 47<br>HN: 35            | MD: 24<br>HN: 24                         |
|                             |                          | R hemi: 26<br>L hemi: 28 | NDH disorder: 4<br>2 UL disorder: 79 | ISSc: 19                | SMA: 3<br>Others (CM, CMD, PPS, ...): 29 | DMD/BMD or LGMD: 19<br>SMA: 7<br>FSHD: 7 |
|                             |                          |                          |                                      |                         |                                          | Others (CM, CMD, PPS, ...): 43           |

CS = chronic stroke; CP = cerebral palsy; RA: rheumatoid arthritis; NMDc = neuromuscular children; NMDa = neuromuscular adults; SSc = systemic sclerosis; R hemi = right hemiplegia; L hemi = left hemiplegia; tetra = tetraplegia; di = diplegia; UL = upper limb; DH = dominant hand; NDH = non-dominant hand; DMD = Duchenne muscular dystrophy; BMD = Becker muscular dystrophy; LGMD = limb girdle muscular dystrophy; HN = hereditary neuropathy; SMA = spinal muscular atrophy; CM = congenital myopathy; CMD = congenital muscular dystrophy; PPS = post-polio syndrome; MD = myotonic dystrophy; FSHD = facio-scapulo-humeral dystrophy; lcSSc = limited cutaneous SSc; dcSSc = diffuse cutaneous SSc; ISSc = limited SSc.

### Manual ability measure

Original data included 83 manual activities shared by at least 2 diagnostic groups (the 83 items are provided in the supplementary table). Original items covered different domains of

1  
2  
3 daily living such as feeding, grooming, or dressing and were selected in previous studies  
4  
5 based on literature review and patient and experts interviews. Twelve items were child-  
6  
7 specific (e.g., ““throwing a ball”), 19 were adult-specific (e.g., “hammering a nail”), and 52  
8  
9 were common to both groups (e.g. “buttoning up trousers”). Adult patients and children’s  
10  
11 parents provided their perceived difficulty in performing each activity based upon a three-  
12  
13 level response scale: impossible (0), difficult (1) or easy (2). Each activity had to be  
14  
15 completed without technical or human assistance and irrespective of the limb(s) and adaptive  
16  
17 strategies used. Missing values were included when a given diagnostic group did not provide  
18  
19 responses for a particular item, as the activity may not have been submitted to a group. The  
20  
21 nature of the items was assessed by ten occupational or physical therapists according to the  
22  
23 following criteria: uni- or bi-manual involvement required to perform the activity; and  
24  
25 involvement of proximal or distal joints.  
26  
27  
28

### 29 **Data analysis**

30  
31 All responses were analysed with RUMM2020®, a Rasch analysis computer program. The  
32  
33 Rasch model[5] can be used to estimate, on a single manual ability construct, the location of  
34  
35 each patient , i.e. their manual ability, the location of each item, i.e. the difficulty of the  
36  
37 manual activities, and the location of each threshold between successive categories of the  
38  
39 response scale, i.e. the locations along the latent construct at which two successive categories  
40  
41 are equally likely to be observed. The model can be used to verify that successive response  
42  
43 categories for each item represent increasing levels of ability and that thresholds between  
44  
45 successive response categories are located in the anticipated order.[17]  
46  
47  
48

49  
50 The model also requires that the probability of endorsing any response category to an item  
51  
52 depends solely on the subject’s ability, the item difficulty and the location of the threshold  
53  
54 between adjacent response categories. In the case of manual ability measurement, no attribute  
55  
56 of the person - such as diagnosis - besides manual ability is theorized to account for the  
57  
58  
59  
60

1  
2  
3 probability of choosing a given response to a given item. The similarity between the observed  
4  
5 and expected responses can be investigated using a  $\chi^2$  fit statistic computed over 5 class  
6  
7 intervals (CI) of patients with increasing ability.[18] Items with a p-value lower than 0.05  
8  
9 indicate a threat to the fit requirement.

### 12 **Invariance of the item difficulty hierarchy**

14 Unidimensionality also requires that patients with identical ability, but different diagnoses,  
15  
16 have the same probability of succeeding any particular item. Consequently, the invariance of  
17  
18 item difficulties across patient diagnostic groups must be controlled using Differential Item  
19  
20 Functioning (DIF) tests.[15] To investigate the invariance of item difficulty hierarchy, a two-  
21  
22 way ANOVA was computed on the standardized residuals of the different CIs [19, 20]; the  
23  
24 first factor was the diagnostic group and the second factor was the CI of increasing manual  
25  
26 ability. Significant diagnostic main effects represented group differences in item difficulty  
27  
28 hierarchy. A solution to the presence of DIF by diagnosis is the removal of items showing  
29  
30 difficulty variations. Another solution is to allow for the variations that exist across DIF items  
31  
32 by splitting them into disease-specific items, one for each diagnostic, with a difficulty peculiar  
33  
34 to the corresponding diagnosis.[16] In this case, the different diagnostic groups can be  
35  
36 compared on the same continuum even if they have specific items provided that there are  
37  
38 common linking items unbiased by DIF.

### 43 **Analysis process**

45 Two different approaches can be used to combine data from different scales responded by  
46  
47 different samples. The 'co-calibration', also called 'concurrent equating', merges all items  
48  
49 together as one scale with empty spaces for missing values. The 'anchoring' approach anchors  
50  
51 items that are common to all diagnoses and then includes diagnosis-specific items in the same  
52  
53 frame of reference. The anchoring approach requires that the common linking items be free of  
54  
55 DIF,[21–23] which was not the case in our dataset. Therefore, the co-calibration approach,  
56  
57  
58  
59  
60



1  
2  
3 also applied in previous rehabilitation studies,[24–27] was followed and the analysis process  
4 is illustrated in Figure 1. The first step in the data analysis was to co-calibrate the  
5 ABILHAND data of all diagnostic groups by analysing all responses (n=732) to the 83 items.  
6  
7 The second step was to remove items with disordered thresholds and items that misfit a  
8 unidimensional variable (i.e., presenting a  $\chi^2$  p-value < 0.05). In the third step, the invariance  
9 of item difficulty hierarchy was detected across diagnostic groups through DIF tests. The  
10 fourth step consisted in splitting the items presenting a DIF by diagnosis providing one  
11 specific item for each diagnostic group who answered the item.[16] In the fifth step, a  
12 principal component analysis (PCA) was performed to identify the potential factors  
13 explaining item difficulty hierarchy variations observed across the diagnostic groups. The  
14 PCA was performed on the differences between item difficulty specific to each diagnostic  
15 group and the average item difficulty for all diagnoses as these differences reflect disease-  
16 specific patterns of item difficulty. In the sixth step, the items presenting a DIF among  
17 diagnoses (detected in the third step) were split into two main groups: asymmetric disorders  
18 (CS and CP) and symmetric disorders (RA, SSc, NMD). Finally, the seventh step included  
19 successive analyses performed to remove items with disordered thresholds, misfitting items,  
20 and items presenting a DIF by diagnosis for another reason than the symmetric/asymmetric  
21 nature of the disorders. So, a generic co-calibrated scale was created and manual ability was  
22 compared among diagnostic groups using a Kruskal-Wallis ANOVA of ranks and Dunn's  
23 method for pairwise multiple comparisons. Finally, the metric properties of the generic scale  
24 were compared with ABILHAND disease-specific scale properties.

## 25 RESULTS

### 26 Invariance of the item difficulty hierarchy

27 Thirty-two of the initial 83 items were deleted due to the unidimensionality requirement  
28 violation. Assessment of invariance from the remaining 51 unidimensional items showed that  
29  
30  
31  
32  
33  
34  
35  
36  
37  
38  
39  
40  
41  
42  
43  
44  
45  
46  
47  
48

1  
2  
3 13 items shared a common location between diagnostic groups. Thirty-eight items presented a  
4 DIF and were split into a total of 152 items with diagnosis-specific locations. Differences  
5 between item difficulty specific to each diagnostic group and the mean item difficulty for all  
6 diagnoses were computed to identify disease-specific patterns of item difficulty. Positive  
7 values indicated that the items were more difficult for a particular diagnosis than average  
8 while negative values indicated that they were easier than average (Figure 2). With respect to  
9 disease-specific item difficulties, bimanual activities, such as “spreading butter on a slice of  
10 bread,” presented a greater challenge for patients with asymmetric disorders (CS and CP) than  
11 for patients with symmetric diagnoses (RA, SSc, NMDc, NMDa). Conversely, unimanual  
12 activities, such as “turning off a tap,” were perceived as easier in asymmetric disordered  
13 patients. About 85% of the DIF items were related to the unimanual or bimanual nature of the  
14 activities.

15  
16  
17  
18  
19  
20  
21  
22  
23  
24  
25  
26  
27  
28  
29  
30 In addition, we found that proximal activities, such as “ringing a door bell,” were categorized  
31 as more difficult for NMD, CP, and CS patients compared to RA and SSc patients. In  
32 contrast, digital activities, such as “counting banknotes,” presented the greatest challenge for  
33 SSc subjects who primary had a distal impairment. Approximately one third of the DIF items  
34 were concerned with the proximal or distal nature of the activities. It should be noted that  
35 some items fit both criteria. Moreover, DIF activities were related, to a lesser extent, to other  
36 factors such as age (about 30% of the items) or mechanical constraints induced in the upper  
37 limb joints (about 10–15% of the items).

#### 47 **PCA on diagnosis-specific-to-average item difficulty differences**

48  
49  
50  
51  
52  
53  
54  
55  
56  
57  
58  
59  
60  
PCA results showed that 57% of the variation of item difficulty hierarchy between diagnostic  
groups was explained by the symmetric or asymmetric nature of the disorders (Figure 3).  
Indeed, CS adults and CP children were located at one extremity of the first PCA component  
while symmetric disorders were located at the other extremity. The second PCA component

1  
2  
3 explained 28% of the variation of item difficulty hierarchy between diagnostic groups and  
4 distinguished patients expressing greater difficulties with proximal activities, such as NMD  
5 and CP, from more distal disorders such as SSc.  
6  
7  
8

#### 9 10 **A “generic” ABILHAND manual ability scale**

11 Based upon PCA results, the DIF items were split into two main groups: asymmetric (CS and  
12 CP) and symmetric (RA, SSc, NMD) disorders. When the 13 items sharing a common  
13 location between diagnostic groups were co-calibrated with the 38 DIF items split into a total  
14 of 75 items (one item was responded neither by CS nor CP subjects) with locations specific to  
15 either asymmetric or symmetric disorders, 2 items with disordered thresholds, 7 misfitting  
16 items, and 27 remaining DIF items were removed. The resulting 52-item generic scale  
17 included 11 items sharing a common location between diagnostic groups and 41 items with  
18 locations specific to asymmetric (27 items) or symmetric (14 items) disorders. The 52 items  
19 are listed in Table 2 in order of decreasing difficulty (range: 3.60 to -3.93 logits).  
20  
21  
22  
23  
24  
25  
26  
27  
28  
29  
30

31 Hand involvement, whether particular groups responded to each item, and item difficulty with  
32 standard errors (mean: 0.20 logits; range: 0.09 to 0.56 logits) are also reported. It should be  
33 noted that only one diagnostic group responded to 21 items (40%) of the generic scale, while  
34 two or three diagnostic groups responded to as many as 12 items (23%). All diagnostic groups  
35 responded to the item “fastening a snap (e.g., jacket, bag).” The person separation reliability  
36 of the generic scale was 0.93, indicating that 5.19 strata of manual ability can be distinguished  
37 in our sample. The average measure of the entire sample was 2.34 logits indicating that the  
38 patients’ ability level exceeded the scale average difficulty.  
39  
40  
41  
42  
43  
44  
45  
46  
47  
48  
49  
50  
51  
52  
53  
54  
55  
56  
57  
58  
59  
60

**Table 2. Final calibration of the six diagnostic groups after the splitting of the DIF items into 2 main groups: asymmetric disorders (CS, CP) and symmetric disorders (RA, SSc, NMDc, NMDa)**

| Item                                                | Hands involvement | Responded by |    |    |     |      |      | Difficulty* (Logits) | SE (Logits) |
|-----------------------------------------------------|-------------------|--------------|----|----|-----|------|------|----------------------|-------------|
|                                                     |                   | CS           | CP | RA | SSc | NMDc | NMDa |                      |             |
| a01 Hammering a nail                                | 2C                | x            |    |    |     |      |      | 3.60                 | 0.23        |
| a02 Cutting one's nails                             | 2C                | x            | x  |    |     |      |      | 3.32                 | 0.15        |
| a03 Threading a needle                              | 2C                | x            |    |    |     |      |      | 3.31                 | 0.23        |
| a04 Peeling potatoes with a knife                   | 2C                | x            |    |    |     |      |      | 3.28                 | 0.23        |
| a05 Wrapping up gifts                               | 2C                | x            |    |    |     |      |      | 3.20                 | 0.25        |
| a06 Filing one's nails                              | 2C                | x            |    |    |     |      |      | 2.82                 | 0.21        |
| a07 Peeling onions                                  | 2C                | x            |    |    |     |      |      | 2.67                 | 0.24        |
| s08 Shelling hazel nuts                             | 2C                |              |    | x  | x   |      |      | 2.38                 | 0.14        |
| a08 Shelling hazel nuts                             | 2C                | x            |    |    |     |      |      | 2.23                 | 0.24        |
| a09 Winding up a wristwatch                         | 2B                | x            |    |    |     |      |      | 2.08                 | 0.20        |
| a10 Using a screwdriver                             | 2B                | x            |    |    |     |      |      | 2.04                 | 0.22        |
| s01 Hammering a nail                                | 2C                |              |    | x  | x   |      |      | 1.88                 | 0.15        |
| s11 Taking the cap off a bottle                     | 2B                |              |    | x  | x   |      | x    | 1.84                 | 0.12        |
| a12 Screwing on a nut                               | 2B                | x            |    |    |     |      |      | 1.81                 | 0.25        |
| s04 Peeling potatoes with a knife                   | 2C                |              |    | x  | x   |      | x    | 1.56                 | 0.12        |
| a13 Sharpening a pencil                             | 2C                | x            | x  |    |     |      |      | 1.31                 | 0.16        |
| a11 Taking the cap off a bottle                     | 2B                | x            |    |    |     |      |      | 1.09                 | 0.23        |
| s07 Peeling onions                                  | 2C                |              |    | x  | x   |      |      | 0.91                 | 0.14        |
| a14 Spreading butter on a slice of bread            | 2B                | x            | x  |    |     |      |      | 0.74                 | 0.16        |
| b15 Fastening a snap (eg, jacket, bag)              | 2A                | x            | x  | x  | x   | x    | x    | 0.68                 | 0.09        |
| a16 Replacing a light bulb                          | 2B                | x            |    |    |     |      |      | 0.59                 | 0.30        |
| s06 Filing one's nails                              | 2C                |              |    | x  | x   |      |      | 0.59                 | 0.14        |
| s16 Replacing a light bulb                          | 2B                |              |    | x  | x   |      |      | 0.48                 | 0.15        |
| s05 Wrapping up gifts                               | 2C                |              |    | x  | x   |      |      | 0.46                 | 0.15        |
| a17 Opening mail                                    | 2B                | x            | x  |    |     |      |      | 0.41                 | 0.16        |
| a18 Handling a stapler                              | 2A                | x            |    |    |     |      |      | 0.19                 | 0.30        |
| b19 Peeling a banana                                | 2B                |              | x  |    |     | x    |      | -0.19                | 0.15        |
| b20 Filling a glass with water                      | 2A                |              | x  |    |     | x    | x    | -0.20                | 0.12        |
| b21 Opening a pack of biscuits                      | 2B                |              | x  |    |     | x    | x    | -0.20                | 0.13        |
| s22 Turning on a tap                                | 1                 |              |    |    |     | x    | x    | -0.21                | 0.15        |
| b23 Opening a car door                              | 1                 |              | x  |    | x   |      |      | -0.48                | 0.15        |
| a24 Opening a bread box                             | 2A                |              | x  |    |     |      |      | -0.56                | 0.22        |
| s25 Picking up a can                                | 1                 |              |    | x  | x   | x    | x    | -0.93                | 0.12        |
| b26 Throwing a ball                                 | 1                 |              | x  |    |     | x    |      | -0.99                | 0.16        |
| b27 Brushing one's hair                             | 1                 | x            | x  | x  | x   |      |      | -1.20                | 0.13        |
| a28 Unwrapping candy                                | 2C                |              | x  |    |     |      |      | -1.20                | 0.23        |
| a22 Turning on a tap                                | 1                 |              | x  |    |     |      |      | -1.41                | 0.26        |
| b29 Washing one's face                              | 1                 | x            | x  | x  | x   |      |      | -1.63                | 0.14        |
| a30 Placing a glass of water on a table             | 1                 | x            | x  |    |     |      |      | -1.70                | 0.22        |
| s31 Dealing cards                                   | 2B                |              |    |    |     | x    |      | -1.80                | 0.25        |
| a32 Drinking a glass of water                       | 1                 | x            | x  |    |     |      |      | -1.87                | 0.25        |
| a33 Handling a 4-colour ballpoint pen with one hand | 1                 | x            |    |    |     |      |      | -2.02                | 0.37        |
| a34 Counting banknotes                              | 2A                | x            |    |    |     |      |      | -2.20                | 0.29        |
| b35 Turning on a radio                              | 1                 | x            |    | x  | x   | x    |      | -2.28                | 0.18        |
| a36 Wiping one's hands                              | 2A                |              | x  |    |     |      |      | -2.32                | 0.26        |
| s37 Using a fork                                    | 1                 |              | x  |    |     | x    | x    | -2.51                | 0.21        |
| s38 Turning on a television                         | 1                 |              |    | x  | x   | x    | x    | -2.56                | 0.18        |
| b39 Piling up Lego® blocks                          | 2A                |              | x  |    |     | x    |      | -2.74                | 0.21        |
| b40 Using a spoon                                   | 1                 | x            |    | x  | x   |      |      | -3.35                | 0.17        |
| a38 Turning on a television                         | 1                 | x            | x  |    |     |      |      | -3.43                | 0.38        |
| a41 Turning off a tap                               | 1                 | x            |    |    |     |      |      | -3.54                | 0.56        |
| s42 Blowing one's nose                              | 1                 |              |    | x  | x   |      |      | -3.93                | 0.23        |

\* higher logit values indicate a greater manual ability for more difficult activities.

a: asymmetric disorders (CS, CP); s: symmetric disorders (RA, SSc, NMDc, NMDa); b: both symmetric and asymmetric disorders; 1 indicates unimanual activities; 2 indicates bimanual activities manageable in several unimanual steps (2A); requiring stabilization with one hand and digital activity with the other (2B); requiring digital activity from both hands (2C). CS: chronic stroke; CP: cerebral palsy; RA: rheumatoid arthritis; SSc: systemic sclerosis; NMDc: neuromuscular children; NMDa: neuromuscular adults; SE: standard error.

### Manual ability across diagnostic groups

Figure 4 shows the distribution of manual ability across the six diagnostic groups. Significant differences in manual ability measures were observed among diagnoses ( $p < 0.001$ ). The CP and NMDc groups had significantly less manual ability than the RA group, who in turn had less manual ability than CS, SSc and NMDa patients ( $p < 0.05$ , Dunn's pairwise comparisons).

### Comparison of the generic and disease-specific scales

As reported in Table 3, standard errors of patient locations were greater for the generic scale than for disease-specific scales, and a smaller range of patient measures was observed in the generic scale. The generic scale is globally less accurate than the disease-specific scales leading to a higher number of extreme persons. In addition, Table 3 shows that manual ability measures of generic and disease-specific scales were highly correlated (range: 0.94–0.97).

Table 3. Comparison of generic and disease-specific scales

| Diagnostic group | Generic scale                  |                            |                      | Disease-specific scales        |                            |                      | Relationship between the measures of generic and disease-specific scales<br>R (p-value) |
|------------------|--------------------------------|----------------------------|----------------------|--------------------------------|----------------------------|----------------------|-----------------------------------------------------------------------------------------|
|                  | Median SE of measures (logits) | Range of measures (logits) | Extreme subjects (%) | Median SE of measures (logits) | Range of measures (logits) | Extreme subjects (%) |                                                                                         |
| CS               | 0.50                           | 7.06                       | 11                   | 0.46                           | 8.56                       | 08                   | 0.95 (< 0.001)                                                                          |
| CP               | 0.53                           | 10.87                      | 09                   | 0.49                           | 11.98                      | 11                   | 0.95 (< 0.001)                                                                          |
| RA               | 0.61                           | 8.27                       | 09                   | 0.44                           | 8.68                       | 09                   | 0.96 (< 0.001)                                                                          |
| SSc              | 0.66                           | 8.45                       | 21                   | 0.46                           | 10.64                      | 12                   | 0.95 (< 0.001)                                                                          |
| NMDc             | 0.70                           | 6.78                       | 23                   | 0.53                           | 8.12                       | 15                   | 0.94 (< 0.001)                                                                          |
| NMDa             | 1.08                           | 10.48                      | 40                   | 0.70                           | 11.14                      | 31                   | 0.97 (< 0.001)                                                                          |

CS: chronic stroke; CP: cerebral palsy; RA: rheumatoid arthritis; SSc: systemic sclerosis; NMDc: neuromuscular children; NMDa: neuromuscular adults; SE: standard error associated to subjects' measure; R: Pearson correlation.

### DISCUSSION

The present study investigated the applicability of a generic manual ability scale unbiased by diagnosis across six populations. We analysed previous subject responses gathered during calibrations of disease-specific ABILHAND questionnaires, and we examined similarities and differences in manual ability among diagnostic groups. A unidimensional scale was constructed with 11 items sharing a common location between diagnostic groups and 41 items

1  
2  
3 having a location specific to asymmetric (CS and CP) or symmetric (NMD, RA, and SSc)  
4 disorders. The resulting generic scale revealed that CP and NMD children had significantly  
5 less manual ability than RA patients, who in turn had significantly less manual ability than  
6 CS, SSc, and NMD adults.  
7  
8

9  
10  
11 A generic manual ability scale should best meet the requirements of upper limb rehabilitation,  
12 insofar as a common instrument with a diagnosis-independent calibration can be used across  
13 clinical settings. Of course, the use of a generic scale assumes that individuals achieving  
14 identical activities have the same manual ability level regardless of their diagnosis. However,  
15 this assumption may not hold true in clinical practice. In our study, we found that only 11 out  
16 of 52 items had difficulties unbiased by diagnosis indicating that individuals' underlying  
17 diseases may bias the perceived difficulty of manual activities. Using a sample size of 100  
18 patients per diagnostic group, a DIF of 1 logit, namely the approximate amplitude of DIF  
19 observed for the items split between symmetric and asymmetric disorders (see Figure 2), in a  
20 test containing 10 items or more answered by at least 100 subjects can be detected at a  
21 significance level of 0.05 with a power of 95% or more.[28] This indicates that the power of  
22 the DIF observed in our study is more than adequate considering the study setup (i.e., test  
23 length, sample size, and significance level). Our results differ from those of Simone et al.[27]  
24 who found that the 23 CS-specific ABILHAND item scale "can be routinely applied to a  
25 variety of motor impairments." These authors argue that the item hierarchy can be  
26 successfully preserved across diagnoses. Using our patient responses, we conducted a  
27 comparable analysis on the same 23 items from the CS-specific ABILHAND scale as Simone  
28 et al.[27] Our findings showed that 21 items (91%) presented a significant DIF, which  
29 contrasts with the apparent invariance reported by Simone et al.[27] Two factors may  
30 contribute to the observed differences in results: sample size and case mix. Our sample  
31 included 732 patients which is significantly more than the 150 subjects in the Simone et al.  
32  
33  
34  
35  
36  
37  
38  
39  
40  
41  
42  
43  
44  
45  
46  
47  
48  
49  
50  
51  
52  
53  
54  
55  
56  
57  
58  
59  
60

1  
2  
3 study.[27] In addition, the unbalanced case mix in the Simone et al.[27] project (83 CS, 17  
4 multiple sclerosis, 13 ataxia, 10 tetraplegics, 3 Parkinson's disease, and 24 healthy controls)  
5 may have concealed possible disease influences on difficulty ratings.  
6  
7

8  
9 An explicit construct theory initiated the development of disease-specific ABILHAND scales.  
10 For each diagnosis, the scale content was selected to delineate a single unidimensional  
11 construct, correlated to the patients' functional, clinical, and demographic characteristics.[6-  
12 10] The nature of the measured variable, namely manual ability, can be determined by  
13 investigating the factors contributing to the hierarchy of manual item difficulty that is  
14 observed across diagnoses. To address this issue, we developed an original methodology that  
15 combines DIF tests, PCA, and manual activities categorization about their nature. Although  
16 an activity is expressed in the same way for all patients, its perceived difficulty may vary  
17 according to one's disease or disorder and the specificity of underlying motor impairments.  
18 Several studies have also shown that manual ability limitations are, at least partially, related to  
19 underlying upper limb impairments.[6, 29] Hence, it is not surprising that disease  
20 characteristics contribute to the difficulties experienced in performing manual activities.  
21  
22  
23  
24  
25  
26  
27  
28  
29  
30  
31  
32  
33  
34  
35

36 The PCA results suggest that the vast majority (85%) of the difficulty variations  
37 observed in manual activities across diagnostic groups was explained by two characteristics:  
38 1) the symmetric or asymmetric nature of the disorder (57% of the item difficulty hierarchy  
39 variations observed across disorders), and 2) the proximal or distal nature of the disorder  
40 (28% of the item difficulty variations). For example, activities requiring greater bimanual  
41 involvement (e.g., "peeling potatoes with a knife") tended to be rated as more difficult by  
42 patients with asymmetric disorders (CP children and CS adults) than by patients with more  
43 symmetric disorders (RA, SSc, NMDc, NMDa). On the other hand, unimanual activities (e.g.,  
44 "turning on a television") or bimanual activities manageable in several unimanual steps (e.g.,  
45 "handling a stapler") were rated as less difficult for patients with asymmetric disorders, likely  
46  
47  
48  
49  
50  
51  
52  
53  
54  
55  
56  
57  
58  
59  
60

1  
2  
3 because these activities can be achieved by exclusively using the unaffected or less affected  
4 hand.[7, 30] Activities involving the shoulder (e.g., “drinking a glass of water”) were  
5  
6 generally more difficult for NMD and CP patients. Indeed, the NMD groups included several  
7  
8 diseases in which proximal segments were more likely to be affected than distal ones (e.g.,  
9  
10 Duchenne/limb girdle muscular dystrophy, facio-scapulo-humeral dystrophy, spinal muscular  
11  
12 atrophy).[10] Moreover, and contrary to other diagnoses, NMD and CP groups included  
13  
14 subjects in a wheelchair, which may prevent the achievement of activities such as, “ringing a  
15  
16 door bell”, or “replacing a light bulb”. In contrast, digital activities (e.g. “winding up a  
17  
18 wristwatch”) were particularly difficult for SSc subjects, who have reduced digital  
19  
20 dexterity.[9] Other characteristics of the diseases than their symmetric/asymmetric or  
21  
22 proximal/digital nature may explain, even though to a lesser extent, the variations of item  
23  
24 difficulty hierarchy between disorders. Activities inducing high mechanical constraints on the  
25  
26 upper limb joints (e.g. “screwing on a nut”) presented the highest challenge for RA patients  
27  
28 due to wrist and metacarpophalangeal joint involvement.[8] Similar to a previous study,[31]  
29  
30 activities related to dressing (e.g., “fastening the zipper of a jacket”) and self-care (e.g.,  
31  
32 “cutting one’s nails”) were more challenging for children than for adults as well as activities  
33  
34 requiring turning something (e.g., “turning on/off a tap”). Parents of unhealthy children may  
35  
36 inhibit some activities to prevent risk (e.g., “cutting one’s nails”) or save time (e.g., dressing  
37  
38 items).[32] Activities related to eating (e.g., “unwrapping a chocolate bar”) were easier for  
39  
40 children than for adults. It can be hypothesized that children are more motivated to  
41  
42 compensate their hand impairments by learning adapted strategies (such as breaking down a  
43  
44 bimanual activity into several unimanual sequences) for eating activities than for dressing or  
45  
46 self-care tasks.[29] It is also important to note that several activities presented a DIF for more  
47  
48 than one reason.  
49  
50  
51  
52  
53  
54  
55  
56  
57  
58  
59  
60



1  
2  
3 Nevertheless, using 11 linked items unbiased by diagnoses, we successfully constructed, from  
4 a metric point of view, a unidimensional scale common to six diagnostic groups by separating  
5 items with difficulties specific to asymmetric and to symmetric disorders. In our study, the  
6  
7 obtained standard errors on items estimates on the generic ABILHAND scale range from 0.09  
8  
9 to 0.56 logits, average 0.20 logits, and correspond to the expected values regarding sample  
10  
11 size and targeting.[33] The strong correlations ( $R \geq 0.94$ ) observed between the generic scale  
12  
13 and each of the disease-specific ABILHAND scales point out that they measure the same  
14  
15 construct, namely, manual ability. However, disease-specific scales which often included a  
16  
17 greater number of disease-relevant activities enable more accurate measures (i.e., patient  
18  
19 estimates have lower standard errors) than the generic scale. This is most likely due to the fact  
20  
21 that disease-specific scales have been constructed to maximize their person separation  
22  
23 reliability and therefore also their accuracy. Overall, our findings are consistent with several  
24  
25 studies showing that disease-specific instruments are substantially more discriminative and  
26  
27 responsive to small deficits than generic instruments.[34, 35] Consequently, this increased  
28  
29 sensitivity allows for the detection and quantification of small, yet clinically significant health  
30  
31 changes.[11, 12] For example, ABILHAND disease-specific scales should be used to  
32  
33 determine pathology impacts on manual ability, to measure clinical changes consecutive to  
34  
35 specific treatments, and to tailor interventions to the specific needs of individuals with a  
36  
37 particular diagnosis. All of these concerns are important for patients and clinicians in their  
38  
39 daily practice. In contrast, the generic ABILHAND scale allows the manual ability of patients  
40  
41 with different diagnoses to be compared and can be used, for example, to identify the relative  
42  
43 burden of diagnoses, compare various health-care programs, and demonstrate evidence of  
44  
45 cost-effectiveness of different healthcare interventions.[11, 12, 36] According to this generic  
46  
47 scale, children had, on the whole, less manual ability than adults. This finding is consistent  
48  
49  
50  
51  
52  
53  
54  
55  
56  
57  
58  
59  
60

1  
2  
3 with previous results[31, 37] showing that children have relatively greater difficulty with  
4  
5 manipulation activities than adults.  
6

7 The generic ABILHAND scale includes 52 items: 11 items sharing a common location  
8  
9 between diagnostic groups and 41 items having a location specific to asymmetric or  
10  
11 symmetric disorders. The 11 common items were used to establish links that connect the 41  
12  
13 items specific to the symmetry of the disorders to place all measures in the same frame of  
14  
15 reference (i.e., on the same “ruler”). From a metric point of view, the common-item linking  
16  
17 has enabled the development of a generic scale that can be used to compare subjects with  
18  
19 various diagnoses since they are located on one single continuum. However, only one fifth of  
20  
21 the items of the “generic” scale are common to several diagnoses. From a clinical point of  
22  
23 view, this means that most manual activities present a difficulty that varies according to the  
24  
25 underlying diagnosis and that various pathologies may affect differently the achievement of  
26  
27 daily activities. The finding that the difficulties of most manual activities were disease-  
28  
29 dependent emphasizes the danger of using generic scales without prior investigation of item  
30  
31 invariance across diagnostic groups.  
32  
33  
34  
35  
36  
37  
38  
39  
40  
41  
42  
43  
44  
45  
46  
47  
48  
49  
50  
51  
52  
53  
54  
55  
56  
57  
58  
59  
60

## COMPETING INTERESTS

None declared.

## FUNDING

This research received no specific grant from any funding agency in the public, commercial or not-for-profit sectors.

## CONTRIBUTORSHIP STATEMENT

CA performed the statistical analyses, conducted the literature search, and drafted the manuscript. CA, LV, and MP participated in the data collection. CA, LV, MP, and JLT contributed to the study design and the data analysis. All authors participated in the data interpretation, critically revised the draft of the manuscript for important intellectual content, and contributed to the writing. All authors have read and approved the final manuscript.

## DATA SHARING STATEMENT

Dataset is available from the corresponding author at [carlyne.arnould@gmail.com](mailto:carlyne.arnould@gmail.com)

**REFERENCES**

1. Cardol M, de Jong BA, van den Bos GA, *et al*. Beyond disability: perceived participation in people with a chronic disabling condition. *Clin Rehabil* 2002;**16**:27–35.
2. Grimby G, Tennant A, Tesio L. The use of raw scores from ordinal scales: time to end malpractice? *J Rehabil Med* 2012;**44**:97–8.
3. Merbitz C, Morris J, Grip JC. Ordinal scales and foundations of misinference. *Arch Phys Med Rehabil* 1989;**70**:308–12.
4. Wright BD, Linacre JM. Observations are always ordinal; measurement, however, must be interval. *Arch Phys Med Rehabil* 1989;**70**:857–60.
5. Rasch G. *Probabilistic models for some intelligence and attainment tests*. Chicago: Mesa Press, 1980.
6. Penta M, Tesio L, Arnould C, *et al*. The ABILHAND questionnaire as a measure of manual ability in chronic stroke patients: Rasch-based validation and relationship to upper limb impairment. *Stroke* 2001;**32**:1627–34.
7. Arnould C, Penta M, Renders A, *et al*. ABILHAND-Kids: a measure of manual ability in children with cerebral palsy. *Neurology* 2004;**63**:1045–52.
8. Durez P, Fraselle V, Houssiau F, *et al*. Validation of the ABILHAND questionnaire as a measure of manual ability in patients with rheumatoid arthritis. *Ann Rheum Dis* 2007;**66**:1098–105.
9. Vanthuyne M, Smith V, Arat S, *et al*. Validation of a manual ability questionnaire in patients with systemic sclerosis. *Arthritis Rheum* 2009;**61**:695–703.
10. Vandervelde L, Van den Bergh PY, Penta M, *et al*. Validation of the ABILHAND questionnaire to measure manual ability in children and adults with neuromuscular disorders. *J Neurol Neurosurg Psychiatry* 2010;**81**:506–12.

- 1  
2  
3 11. Patrick DL, Deyo RA. Generic and disease-specific measures in assessing health status  
4 and quality of life. *Med Care* 1989;**27**(3 Suppl):217–32S.
- 5  
6  
7 12. Marra CA, Woolcott JC, Kopec JA, *et al.* A comparison of generic, indirect utility  
8 measures (the HUI2, HUI3, SF-6D, and the EQ-5D) and disease-specific instruments (the  
9 RAQol and the HAQ) in rheumatoid arthritis. *Soc Sci Med* 2005;**60**:1571–82.
- 10  
11  
12 13. Haigh R, Tennant A, Biering-Sorensen F, *et al.* The use of outcome measures in physical  
13 medicine and rehabilitation within Europe. *J Rehabil Med* 2001;**33**:273–8.
- 14  
15  
16 14. Tennant A, McKenna SP, Hagell P. Application of Rasch analysis in the development and  
17 application of quality of life instruments. *Value Health* 2004; **7**(Suppl 1):22–6.
- 18  
19  
20 15. Holland PW, Wainer H. *Differential Item Functioning*. Hillsdale, New Jersey: Lawrence  
21 Erlbaum, 1993.
- 22  
23  
24 16. Tennant A, Penta M, Tesio L, *et al.* Assessing and adjusting for cross-cultural validity of  
25 impairment and activity limitation scales through differential item functioning within the  
26 framework of the Rasch model: the PRO-ESOR project. *Med Care* 2004;**42**(1 Suppl): 37–  
27 48S.
- 28  
29  
30 17. Andrich D. Category ordering and their utility. *Rasch Measurement Transactions*  
31 1996;**9**:464–5.
- 32  
33  
34 18. Andrich D. *Rasch analysis for measurement*. London: Sage Publications Ltd; 1988.
- 35  
36  
37 19. RUMM Laboratory. *Interpreting RUMM2020: Part 1, dichotomous data*. Perth, Western  
38 Australia: RUMM Laboratory, 2004.
- 39  
40  
41 20. RUMM Laboratory. *Interpreting RUMM2020: Part 2, polytomous data*. Perth, Western  
42 Australia: RUMM Laboratory, 2004.
- 43  
44  
45 21. Equating/linking with anchors. *Rasch Measurement Transactions* 2004;**18**:993.
- 46  
47  
48 22. Wright B. Anchoring & standard-errors. *Rasch Measurement Transactions* 1993;**6**:259.
- 49  
50  
51  
52  
53  
54  
55  
56  
57  
58  
59  
60

- 1  
2  
3 23. Ingebo G. Linking tests with the Rasch model. *Rasch Measurement Transactions*  
4  
5 1997;**11**:549.  
6  
7 24. Lundgren-Nilsson A, Tennant A, Grimby G, *et al*. Cross-diagnostic validity in a generic  
8  
9 instrument: an example from the Functional Independence Measure in Scandinavia.  
10  
11 *Health Qual Life Outcomes* 2006;**4**:55.  
12  
13 25. Dallmeijer AJ, de Groot V, Roorda LD, *et al*. Cross-diagnostic validity of the SF-36  
14  
15 physical functioning scale in patients with stroke, multiple sclerosis and amyotrophic  
16  
17 lateral sclerosis: a study using Rasch analysis. *J Rehabil Med* 2007;**39**:163–9.  
18  
19 26. Wann-Hansson C, Klevsgard R, Hagell P. Cross-diagnostic validity of the Nottingham  
20  
21 health profile index of distress (NHPD). *Health Qual Life Outcomes* 2008;**6**:47.  
22  
23 27. Simone A, Rota V, Tesio L, *et al*. Generic ABILHAND questionnaire can measure  
24  
25 manual ability across a variety of motor impairments. *Int J Rehabil Res* 2011;**34**:131–40.  
26  
27 28. Scott NW, Fayers PM, Aaronson NK, *et al*. A simulation study provided sample size  
28  
29 guidance for differential item functioning (DIF) studies using short scales. *J Clin*  
30  
31 *Epidemiol* 2009;**62**:288–95.  
32  
33 29. Arnould C, Penta M, Thonnard J-L. Hand impairments and their relationship with manual  
34  
35 ability in children with cerebral palsy. *J Rehabil Med* 2007;**39**:708–14.  
36  
37 30. Sakzewski L, Ziviani J, Boyd R. The relationship between unimanual capacity and  
38  
39 bimanual performance in children with congenital hemiplegia. *Dev Med Child Neurol*  
40  
41 2010;**52**:811–6.  
42  
43 31. Haley SM, Ludlow LH. Applicability of the hierarchical scales of the Tufts Assessment of  
44  
45 Motor Performance for school-aged children and adults with disabilities. *Phys Ther*  
46  
47 1992;**72**:191–202.  
48  
49  
50  
51  
52  
53  
54  
55  
56  
57  
58  
59  
60

- 1  
2  
3 32. Sperle PA, Ottenbacher KJ, Braun SL, *et al.* Equivalence reliability of the Functional  
4 Independence Measure for Children (WeeFIM®) administration methods. *Am J Occup*  
5 *Ther* 1997;**51**:35–41.  
6  
7  
8  
9  
10 33. Linacre JM. Sample Size and Item Calibration Stability. *Rasch Measurement*  
11 *Transactions* 1994;**7**:328.  
12  
13  
14 34. Murawski MM, Miederhoff PA. On the generalizability of statistical expressions of health  
15 related quality of life instrument responsiveness: a data synthesis. *Qual Life Res*  
16 1998;**7**:11–22.  
17  
18  
19  
20 35. Wiebe S, Guyatt G, Weaver B, *et al.* Comparative responsiveness of generic and specific  
21 quality-of-life instruments. *J Clin Epidemiol* 2003;**56**:52–60.23.  
22  
23  
24  
25 36. Mazur W, Kupiainen H, Pitkaniemi J, *et al.* Comparison between the disease-specific  
26 Airways Questionnaire 20 and the generic 15D instruments in COPD. *Health Qual Life*  
27 *Outcomes* 2011;**9**:4.  
28  
29  
30  
31 37. van Eck M, Dallmeijer AJ, van Lith IS, *et al.* Manual ability and its relationship with daily  
32 activities in adolescents with cerebral palsy. *J Rehabil Med* 2010;**42**:493–8.  
33  
34  
35  
36  
37  
38  
39  
40  
41  
42  
43  
44  
45  
46  
47  
48  
49  
50  
51  
52  
53  
54  
55  
56  
57  
58  
59  
60

**FIGURE LEGENDS**

**Figure 1.** Flow diagram illustrating the analysis process steps. DIF = differential item functioning; PCA = principal component analysis; CS = chronic stroke; CP = cerebral palsy; NMDc = neuromuscular children; NMDa = neuromuscular adults; RA = rheumatoid arthritis; and SSc = systemic sclerosis.

**Figure 2.** Disease-specific patterns of item difficulty according to the bimanual or proximal nature of the activities showing a Differential Item Functioning. Differences between item difficulty ratings specific to each diagnostic group ( $\delta_{\text{specific}}$ ) and the average item difficulty for all diagnoses ( $\delta_{\text{mean}}$ ) are shown for each disorder (CS = chronic stroke; CP = cerebral palsy; RA = rheumatoid arthritis; SSc = systemic sclerosis; NMDc = neuromuscular children; and NMDa = neuromuscular adults). Boxes indicate the 25% and 75% limits (the interquartile range); the vertical line inside each box indicates the median; vertical bars outside each box indicate the 10% and 90% limits and dots indicate the 5% and 95% outliers.

**Figure 3.** PCA results based upon differences between disease-specific difficulty of the split DIF items and the average item difficulty across all diagnoses. CP = cerebral palsy; NMDc = neuromuscular children; RA = rheumatoid arthritis; SSc = systemic sclerosis; and NMDa = neuromuscular adults. CS = chronic stroke;

**Figure 4.** Box plots showing the distribution of manual ability measures for each diagnosis. Boxes indicate the 25% and 75% limits (the interquartile range); the vertical line inside each box indicates the median; vertical bars outside each box indicate the 10% and 90% limits and dots indicate the 5% and 95% outliers. CP = cerebral palsy; NMDc = neuromuscular children; RA = rheumatoid arthritis; NMDa = neuromuscular adults; SSc = systemic sclerosis; and CS = chronic stroke.



**ARTICLE TITLE:**

Can manual ability be measured with a generic ABILHAND scale? A cross-sectional study conducted on six diagnostic groups

**AUTHORS:**

Carlyne Arnould<sup>1</sup> (PhD), Laure Vandervelde<sup>2</sup> (PhD), Charles Sèbiyo Batcho<sup>3</sup> (PT), Massimo Penta<sup>3</sup> (PhD), Jean-Louis Thonnard<sup>3</sup> (PhD)

1 Physical and Occupational Therapy Departments, Paramedical Category, Haute Ecole Louvain en Hainaut, Montignies-sur-Sambre, Belgium

2 Physical Therapy Department, Institut Parnasse Deux-Alice, Haute Ecole Leonard de Vinci, Brussels, Belgium

3 Institute of Neuroscience, Université catholique de Louvain, Brussels, Belgium

**CORRESPONDING AUTHOR:**

Dr. Carlyne Arnould

Physical and Occupational Therapy Departments

Paramedical Category

Haute Ecole Louvain en Hainaut

Rue Trieu Kaisin, 134

6061 Montignies-sur-Sambre

Belgium

Tel. + 32 498 59 31 33

E-mail. [carlyne.arnould@gmail.com](mailto:carlyne.arnould@gmail.com)

1  
2  
3  
4  
5 **KEYWORDS:** motor skills disorders, upper extremity, hand, activities of daily living,  
6  
7 questionnaires  
8  
9

## 10 11 **WORD COUNTS**

12  
13  
14 **The title includes 103 characters.**

15  
16 **The abstract includes 297 words.**

17  
18 **This manuscript includes 3 tables and 4 figures, 3994 words**  
19  
20

## 21 22 **LIST OF TABLES**

23  
24  
25 Table 1. Sample characteristics (n = 732)

26  
27 Table 2. Final calibration of the six diagnostic groups after the splitting of the DIF items into  
28  
29 two main groups: asymmetric disorders (CS, CP) and symmetric disorders (RA, SSC, NMDc,  
30  
31 NMDa)  
32

33  
34 Table 3. Comparison of generic and disease-specific scales  
35  
36  
37

## 38 39 **LIST OF FIGURES**

40  
41 **Figure 1. Flow diagram illustrating the analysis process steps.**

42  
43 **Figure 2.** Disease-specific patterns of item difficulty according to the bimanual or proximal  
44  
45 nature of the activities showing a Differential Item Functioning

46  
47 **Figure 3.** PCA results based upon differences between disease-specific difficulty of the split  
48  
49 DIF items and the average item difficulty across all diagnoses

50  
51 **Figure 4.** Distribution of manual ability measures for each diagnosis  
52  
53  
54  
55  
56  
57  
58  
59  
60

## ABSTRACT

**Objectives:** Several ABILHAND Rasch-built manual ability scales were previously developed for chronic stroke (CS), cerebral palsy (CP), rheumatoid arthritis (RA), systemic sclerosis (SSc), and neuromuscular disorders (NMD). The present study aimed to explore the applicability of a generic manual ability scale unbiased by diagnosis and to study the nature of manual ability across diagnoses.

**Design:** cross-sectional study.

**Setting:** outpatient clinic homes (CS, CP, RA), specialized centers (CP), reference centers (CP, NMD), and university hospitals (SSc).

**Participants:** 762 patients from six diagnostic groups: 103 CS adults, 113 CP children, 112 RA adults, 156 SSc adults, 124 NMD children and 124 NMD adults.

**Primary and secondary outcome measures:** manual ability as measured by the ABILHAND disease-specific questionnaires, diagnosis, and nature (i.e., uni- or bi-manual involvement and proximal or distal joints involvement) of the ABILHAND manual activities.

**Results:** The difficulty of most manual activities was diagnosis-dependent. A principal component analysis highlighted that 57% of the variance in the item difficulty between diagnoses was explained by the symmetric or asymmetric nature of the disorders. A generic scale was constructed, from a metric point of view, with 11 items sharing a common difficulty among diagnoses and 41 items displaying a category-specific location (asymmetric: CS, CP; and symmetric: RA, SSc, NMD). This generic scale showed that CP and NMD children had significantly less manual ability than RA patients, who had significantly less manual ability than CS, SSc, and NMD adults. However, the generic scale was less discriminative and responsive to small deficits than disease-specific instruments.

**Conclusions:** Our finding that most of the manual item difficulties were disease-dependent emphasizes the danger of using generic scales without prior investigation of item invariance

1  
2  
3  
4  
5  
6  
7  
8  
9  
10  
11  
12  
13  
14  
15  
16  
17  
18  
19  
20  
21  
22  
23  
24  
25  
26  
27  
28  
29  
30  
31  
32  
33  
34  
35  
36  
37  
38  
39  
40  
41  
42  
43  
44  
45  
46  
47  
48  
49  
50  
51  
52  
53  
54  
55  
56  
57  
58  
59  
60

across diagnostic groups. Nevertheless, a generic manual ability scale could be developed by adjusting and accounting for activities perceived differently in various disorders.

For peer review only

## ARTICLE SUMMARY

### Article focus:

- To explore the applicability of a generic ABILHAND manual ability scale unbiased by diagnosis across various clinical populations.
- To analyse prior data from cross-sectional studies that developed disease-specific manual ability questionnaires in order to investigate the co-calibration of patient perceived item difficulty on a common metric.
- To better understand the nature of the measured variable, namely manual ability.

### Key messages:

- The difficulty of most manual activities was diagnosis-dependent, emphasizing the danger of using generic scales without prior investigation of item invariance across diagnostic groups.
- The vast majority (85%) of the difficulty variations observed in manual activities across diagnostic groups was explained by 1) the symmetric or asymmetric nature of the disorder (57% of the variance) and 2) the proximal or distal nature of the disorder (28% of the variance).
- Although less sensitive than diagnosis-specific scales, a generic manual ability scale could be developed by adjusting and accounting for activities perceived differently in various disorders, which allows quantitative comparisons of manual ability between diagnostic groups.

### Strengths and limitations of this study:

- Our study explores a large set of data (732 patients) spread out evenly over 6 diagnostic groups (stroke adults, cerebral palsy children, adults with rheumatoid arthritis, adults with systemic sclerosis, children and adults with neuromuscular disorders).

- Our study proposes an original methodology (combining differential item functioning tests, principal component analysis, and manual activities categorization) that investigates the factors contributing to the hierarchy of manual item difficulty observed across diagnoses allowing the nature of manual ability to be better understood.

For peer review only

## INTRODUCTION

One fundamental goal of rehabilitation is to improve the subjects' ability to manage the daily activities necessary for autonomous living.[1] Such an ability belongs to the domain of latent variables concealed within the person, such as pain or intelligence. It cannot be observed directly, but it can be inferred from subject's perceived difficulty in performing activities, also called items, using patient self-reported questionnaires. Over the past decade, questionnaires have therefore become widely used as outcome measures in clinical trials[2] and rating scale data are becoming integral to patient care, prescribing, and policymaking. It is essential that functional rating scales provide scientifically robust and clinically meaningful results to ensure appropriate interpretations and decision-making regarding disease effects, clinical implications, treatment, health policies, and resource allocation. Unfortunately, most rating scales generate ordinal data by summing scores assigned to a set of items representing the intended variable, and metric properties of raw ordinal scores are known to have limited validity.[3, 4] In view of this limitation, the Rasch model[5] is becoming increasingly popular for health measurements because it enables the direct transformation from ordinal scores to linear measures with a constant unit.

Over the last 20 years, our research group has developed several manual ability rating scales (known under the umbrella term of ABILHAND questionnaires) by applying the Rasch model to various diagnostic groups. ABILHAND scales are self-administered questionnaires that measure "manual ability", which is defined as, "the capacity to manage daily activities requiring the use of the upper limbs, whatever the strategies involved".[6] Disease-specific manual ability "rulers" were previously developed for the following patient groups: chronic stroke (CS),[6] cerebral palsy (CP),[7] rheumatoid arthritis (RA),[8] systemic sclerosis (SSc),[9] and neuromuscular disorders (NMD).[10] Each ABILHAND scale has its own Rasch-derived item difficulty calibration, which defines a disease-specific manual ability

1  
2  
3 measurement continuum. ABILHAND questionnaires present good psychometric qualities,  
4 including linearity, unidimensionality, construct validity, and test-retest reliability.

5  
6  
7 Disease-specific scales, which are highly sensitive and detect small, yet clinically important  
8 changes, are frequently used in research because they ensure comprehensive assessment of  
9 health aspects directly related to the condition.[11, 12] In contrast, generic scales enable  
10 comparisons of various diagnoses and healthcare interventions, which may provide useful  
11 data for health policies, cost-effective analyses, and resource allocation.[11, 12] They best  
12 meet rehabilitation requirements when disability treatment is not dependent upon a specific  
13 underlying diagnosis. [13] For instance, as a single bathroom scale can be used to weigh all  
14 patients, a generic manual ability scale would enable quantitative comparisons of the ability to  
15 use the upper limbs in daily activities across patients of various diagnoses (and also with  
16 healthy subjects).

17  
18  
19 From a metric point of view, it is possible to co-calibrate various disease-specific  
20 ABILHAND questionnaire items on the same scale, provided that the scales are based on an  
21 identical unidimensional construct.[14] In theory, and similar to the graduations of a metric  
22 ruler, items should have the same difficulty for all diagnostic groups, regardless of the disease  
23 being measured. Nevertheless, the main implicit assumption made by the users of generic  
24 scales is that the difficulties of daily activities are invariant across diagnoses. However, in  
25 practice, item difficulty hierarchy may vary across groups, demonstrating Differential Item  
26 Functioning (DIF).[15] The Rasch model can be used to test the invariance of item difficulty  
27 hierarchy and to accommodate for DIF.[16] When the items of a generic scale are unstable  
28 across diagnoses, the measurements generated by them cannot be used to make meaningful  
29 comparisons.

30  
31  
32 The present study explored the applicability of a generic ABILHAND manual ability scale,  
33 which is unbiased by diagnoses, across various clinical populations. Setting out this objective,



we also intended to improve the current understanding of the nature of manual ability and especially its interaction with diagnosis. We analysed prior data from cross-sectional studies that developed disease-specific manual ability questionnaires in order to investigate the co-calibration of patient perceived item difficulty on a common metric.

## METHODS

### Subjects

Data from 732 subjects, who previously provided informed consent, were analysed. Patients with the following disorders were evaluated: 103 CS adults,[6] 113 CP children,[7] 112 RA adults,[8] 156 SSc adults,[9] 124 NMD children (NMDc) and 124 NMD adults (NMDa).[10] Table 1 provides patient characteristics. The ethics committee of the Université catholique de Louvain, Faculty of Medicine in Brussels, Belgium, authorized and approved the study.

Table 1. Sample characteristics (n = 732)

| Variables                   | CS                       | CP                  | RA                                                                           | SSc                                 | NMDc                                                                      | NMDa                                                                                           |
|-----------------------------|--------------------------|---------------------|------------------------------------------------------------------------------|-------------------------------------|---------------------------------------------------------------------------|------------------------------------------------------------------------------------------------|
| <b>Number of subjects</b>   | 103                      | 113                 | 112                                                                          | 156                                 | 124                                                                       | 124                                                                                            |
| <b>Age, y, mean (range)</b> | 63 (24-84)               | 10 (6-15)           | 55 (25-82)                                                                   | 54 (21-82)                          | 10 (6-16)                                                                 | 47 (16-80)                                                                                     |
| <b>Sex</b>                  |                          |                     |                                                                              |                                     |                                                                           |                                                                                                |
| <b>Males</b>                | 64                       | 67                  | 29                                                                           | 32                                  | 84                                                                        | 69                                                                                             |
| <b>Females</b>              | 39                       | 46                  | 83                                                                           | 124                                 | 40                                                                        | 55                                                                                             |
| <b>Diagnosis</b>            | R hemi: 55<br>L hemi: 48 | tetra: 35<br>di: 24 | No UL disorder: 20<br>DH disorder: 9<br>NDH disorder: 4<br>2 UL disorder: 79 | lcSSc: 104<br>dcSSc: 33<br>ISSc: 19 | DMD/BMD or LGMD: 47<br>HN: 35<br>SMA: 3<br>Others (CM, CMD, PPS, ...): 29 | MD: 24<br>HN: 24<br>DMD/BMD or LGMD: 19<br>SMA: 7<br>FSHD: 7<br>Others (CM, CMD, PPS, ...): 43 |

CS = chronic stroke; CP = cerebral palsy; RA: rheumatoid arthritis; NMDc = neuromuscular children; NMDa = neuromuscular adults; SSc = systemic sclerosis; R hemi = right hemiplegia; L hemi = left hemiplegia; tetra = tetraplegia; di = diplegia; UL = upper limb; DH = dominant hand; NDH = non-dominant hand; DMD = Duchenne muscular dystrophy; BMD = Becker muscular dystrophy; LGMD = limb girdle muscular dystrophy; HN = hereditary neuropathy; SMA = spinal muscular atrophy; CM = congenital myopathy; CMD = congenital muscular dystrophy; PPS = post-polio syndrome; MD = myotonic dystrophy; FSHD = facio-scapulo-humeral dystrophy; lcSSc = limited cutaneous SSc; dcSSc = diffuse cutaneous SSc; ISSc = limited SSc.

### Manual ability measure

Original data included 83 manual activities shared by at least 2 diagnostic groups (the 83 items are provided in the supplementary table). Original items covered different domains of

1  
2  
3 daily living such as feeding, grooming, or dressing and were selected in previous studies  
4  
5 based on literature review and patient and experts interviews. Twelve items were child-  
6  
7 specific (e.g., “throwing a ball”), 19 were adult-specific (e.g., “hammering a nail”), and 52  
8  
9 were common to both groups (e.g. “buttoning up trousers”). Adult patients and children’s  
10  
11 parents provided their perceived difficulty in performing each activity based upon a three-  
12  
13 level response scale: impossible (0), difficult (1) or easy (2). Each activity had to be  
14  
15 completed without technical or human assistance and irrespective of the limb(s) and adaptive  
16  
17 strategies used. Missing values were included when a given diagnostic group did not provide  
18  
19 responses for a particular item, as the activity may not have been submitted to a group. The  
20  
21 nature of the items was assessed by ten occupational or physical therapists according to the  
22  
23 following criteria: uni- or bi-manual involvement required to perform the activity; and  
24  
25 involvement of proximal or distal joints.  
26  
27  
28

### 29 **Data analysis**

30  
31 All responses were analysed with RUMM2020®, a Rasch analysis computer program. The  
32  
33 Rasch model[5] can be used to estimate, on a single manual ability construct, the location of  
34  
35 each patient, i.e. their manual ability, the location of each item, i.e. the difficulty of the  
36  
37 manual activities, and the location of each threshold between successive categories of the  
38  
39 response scale, i.e. the locations along the latent construct at which two successive categories  
40  
41 are equally likely to be observed. The model can be used to verify that successive response  
42  
43 categories for each item represent increasing levels of ability and that thresholds between  
44  
45 successive response categories are located in the anticipated order.[17]  
46  
47  
48

49 The model also requires that the probability of endorsing any response category to an item  
50  
51 depends solely on the subject’s ability, the item difficulty and the location of the threshold  
52  
53 between adjacent response categories. In the case of manual ability measurement, no attribute  
54  
55 of the person - such as diagnosis - besides manual ability is theorized to account for the  
56  
57  
58  
59  
60

1  
2  
3 probability of choosing a given response to a given item. The similarity between the observed  
4  
5 and expected responses can be investigated using a  $\chi^2$  fit statistic computed over 5 class  
6  
7 intervals (CI) of patients with increasing ability.[18] Items with a p-value lower than 0.05  
8  
9 indicate a threat to the fit requirement.

### 10 11 **Invariance of the item difficulty hierarchy**

12  
13  
14 Unidimensionality also requires that patients with identical ability, but different diagnoses,  
15  
16 have the same probability of succeeding any particular item. Consequently, the invariance of  
17  
18 item difficulties across patient diagnostic groups must be controlled using Differential Item  
19  
20 Functioning (DIF) tests.[15] To investigate the invariance of item difficulty hierarchy, a two-  
21  
22 way ANOVA was computed on the standardized residuals of the different CIs [19, 20]; the  
23  
24 first factor was the diagnostic group and the second factor was the CI of increasing manual  
25  
26 ability. Significant diagnostic main effects represented group differences in item difficulty  
27  
28 hierarchy. A solution to the presence of DIF by diagnosis is the removal of items showing  
29  
30 difficulty variations. Another solution is to allow for the variations that exist across DIF items  
31  
32 by splitting them into disease-specific items, one for each diagnostic, with a difficulty peculiar  
33  
34 to the corresponding diagnosis.[16] In this case, the different diagnostic groups can be  
35  
36 compared on the same continuum even if they have specific items provided that there are  
37  
38 common linking items unbiased by DIF.  
39  
40  
41  
42

### 43 **Analysis process**

44  
45 Two different approaches can be used to combine data from different scales responded by  
46  
47 different samples. The 'co-calibration', also called 'concurrent equating', merges all items  
48  
49 together as one scale with empty spaces for missing values. The 'anchoring' approach anchors  
50  
51 items that are common to all diagnoses and then includes diagnosis-specific items in the same  
52  
53 frame of reference. The anchoring approach requires that the common linking items be free of  
54  
55 DIF,[21–23] which was not the case in our dataset. Therefore, the co-calibration approach,  
56  
57  
58  
59  
60

1  
2  
3 also applied in previous rehabilitation studies,[24–27] was followed and the analysis process  
4  
5 is illustrated in Figure 1. The first step in the data analysis was to co-calibrate the  
6  
7 ABILHAND data of all diagnostic groups by analysing all responses (n=732) to the 83 items.  
8  
9 The second step was to remove items with disordered thresholds and items that misfit a  
10  
11 unidimensional variable (i.e., presenting a  $\chi^2$  p-value < 0.05). In the third step, the invariance  
12  
13 of item difficulty hierarchy was detected across diagnostic groups through DIF tests. The  
14  
15 fourth step consisted in splitting the items presenting a DIF by diagnosis providing one  
16  
17 specific item for each diagnostic group who answered the item.[16] In the fifth step, a  
18  
19 principal component analysis (PCA) was performed to identify the potential factors  
20  
21 explaining item difficulty hierarchy variations observed across the diagnostic groups. The  
22  
23 PCA was performed on the differences between item difficulty specific to each diagnostic  
24  
25 group and the average item difficulty for all diagnoses as these differences reflect disease-  
26  
27 specific patterns of item difficulty. In the sixth step, the items presenting a DIF among  
28  
29 diagnoses (detected in the third step) were split into two main groups: asymmetric disorders  
30  
31 (CS and CP) and symmetric disorders (RA, SSc, NMD). Finally, the seventh step included  
32  
33 successive analyses performed to remove items with disordered thresholds, misfitting items,  
34  
35 and items presenting a DIF by diagnosis for another reason than the symmetric/asymmetric  
36  
37 nature of the disorders. So, a generic co-calibrated scale was created and manual ability was  
38  
39 compared among diagnostic groups using a Kruskal-Wallis ANOVA of ranks and Dunn's  
40  
41 method for pairwise multiple comparisons. Finally, the metric properties of the generic scale  
42  
43 were compared with ABILHAND disease-specific scale properties.  
44  
45  
46  
47  
48

## 49 RESULTS

### 50 Invariance of the item difficulty hierarchy

51  
52 Thirty-two of the initial 83 items were deleted due to the unidimensionality requirement  
53  
54 violation. Assessment of invariance from the remaining 51 unidimensional items showed that  
55  
56  
57  
58  
59  
60

1  
2  
3 13 items shared a common location between diagnostic groups. Thirty-eight items presented a  
4 DIF and were split into a total of 152 items with diagnosis-specific locations. Differences  
5  
6 between item difficulty specific to each diagnostic group and the mean item difficulty for all  
7 diagnoses were computed to identify disease-specific patterns of item difficulty. Positive  
8 values indicated that the items were more difficult for a particular diagnosis than average  
9 while negative values indicated that they were easier than average (Figure 2). With respect to  
10 disease-specific item difficulties, bimanual activities, such as “spreading butter on a slice of  
11 bread,” presented a greater challenge for patients with asymmetric disorders (CS and CP) than  
12 for patients with symmetric diagnoses (RA, SSc, NMDc, NMDa). Conversely, unimanual  
13 activities, such as “turning off a tap,” were perceived as easier in asymmetric disordered  
14 patients. About 85% of the DIF items were related to the unimanual or bimanual nature of the  
15 activities.

16  
17  
18  
19  
20  
21  
22  
23  
24  
25  
26  
27  
28  
29  
30 In addition, we found that proximal activities, such as “ringing a door bell,” were categorized  
31 as more difficult for NMD, CP, and CS patients compared to RA and SSc patients. In  
32 contrast, digital activities, such as “counting banknotes,” presented the greatest challenge for  
33 SSc subjects who primary had a distal impairment. Approximately one third of the DIF items  
34 were concerned with the proximal or distal nature of the activities. It should be noted that  
35 some items fit both criteria. Moreover, DIF activities were related, to a lesser extent, to other  
36 factors such as age (about 30% of the items) or mechanical constraints induced in the upper  
37 limb joints (about 10–15% of the items).

#### 38 39 40 41 42 43 44 45 46 47 **PCA on diagnosis-specific-to-average item difficulty differences**

48  
49  
50  
51  
52  
53  
54  
55  
56  
57  
58  
59  
60  
PCA results showed that 57% of the variation of item difficulty hierarchy between diagnostic groups was explained by the symmetric or asymmetric nature of the disorders (Figure 3).

Indeed, CS adults and CP children were located at one extremity of the first PCA component while symmetric disorders were located at the other extremity. The second PCA component

1  
2  
3 explained 28% of the variation of item difficulty hierarchy between diagnostic groups and  
4 distinguished patients expressing greater difficulties with proximal activities, such as NMD  
5 and CP, from more distal disorders such as SSc.  
6  
7  
8

#### 9 10 **A “generic” ABILHAND manual ability scale**

11 Based upon PCA results, the DIF items were split into two main groups: asymmetric (CS and  
12 CP) and symmetric (RA, SSc, NMD) disorders. When the 13 items sharing a common  
13 location between diagnostic groups were co-calibrated with the 38 DIF items split into a total  
14 of 75 items (one item was responded neither by CS nor CP subjects) with locations specific to  
15 either asymmetric or symmetric disorders, 2 items with disordered thresholds, 7 misfitting  
16 items, and 27 remaining DIF items were removed. The resulting 52-item generic scale  
17 included 11 items sharing a common location between diagnostic groups and 41 items with  
18 locations specific to asymmetric (27 items) or symmetric (14 items) disorders. The 52 items  
19 are listed in Table 2 in order of decreasing difficulty (range: 3.60 to -3.93 logits).  
20  
21  
22  
23  
24  
25  
26  
27  
28  
29  
30

31 Hand involvement, whether particular groups responded to each item, and item difficulty with  
32 standard errors (mean: 0.20 logits; range: 0.09 to 0.56 logits) are also reported. It should be  
33 noted that only one diagnostic group responded to 21 items (40%) of the generic scale, while  
34 two or three diagnostic groups responded to as many as 12 items (23%). All diagnostic groups  
35 responded to the item “fastening a snap (e.g., jacket, bag).” The person separation reliability  
36 of the generic scale was 0.93, indicating that 5.19 strata of manual ability can be distinguished  
37 in our sample. The average measure of the entire sample was 2.34 logits indicating that the  
38 patients’ ability level exceeded the scale average difficulty.  
39  
40  
41  
42  
43  
44  
45  
46  
47  
48  
49  
50  
51  
52  
53  
54  
55  
56  
57  
58  
59  
60

**Table 2. Final calibration of the six diagnostic groups after the splitting of the DIF items into 2 main groups: asymmetric disorders (CS, CP) and symmetric disorders (RA, SSc, NMDc, NMDa)**

| Item                                                | Hands involvement | Responded by |    |    |     |      |      | Difficulty*<br>(Logits) | SE<br>(Logits) |
|-----------------------------------------------------|-------------------|--------------|----|----|-----|------|------|-------------------------|----------------|
|                                                     |                   | CS           | CP | RA | SSc | NMDc | NMDa |                         |                |
| a01 Hammering a nail                                | 2C                | x            |    |    |     |      |      | 3.60                    | 0.23           |
| a02 Cutting one's nails                             | 2C                | x            | x  |    |     |      |      | 3.32                    | 0.15           |
| a03 Threading a needle                              | 2C                | x            |    |    |     |      |      | 3.31                    | 0.23           |
| a04 Peeling potatoes with a knife                   | 2C                | x            |    |    |     |      |      | 3.28                    | 0.23           |
| a05 Wrapping up gifts                               | 2C                | x            |    |    |     |      |      | 3.20                    | 0.25           |
| a06 Filing one's nails                              | 2C                | x            |    |    |     |      |      | 2.82                    | 0.21           |
| a07 Peeling onions                                  | 2C                | x            |    |    |     |      |      | 2.67                    | 0.24           |
| s08 Shelling hazel nuts                             | 2C                |              |    | x  | x   |      |      | 2.38                    | 0.14           |
| a08 Shelling hazel nuts                             | 2C                | x            |    |    |     |      |      | 2.23                    | 0.24           |
| a09 Winding up a wristwatch                         | 2B                | x            |    |    |     |      |      | 2.08                    | 0.20           |
| a10 Using a screwdriver                             | 2B                | x            |    |    |     |      |      | 2.04                    | 0.22           |
| s01 Hammering a nail                                | 2C                |              |    | x  | x   |      |      | 1.88                    | 0.15           |
| s11 Taking the cap off a bottle                     | 2B                |              |    | x  | x   |      | x    | 1.84                    | 0.12           |
| a12 Screwing on a nut                               | 2B                | x            |    |    |     |      |      | 1.81                    | 0.25           |
| s04 Peeling potatoes with a knife                   | 2C                |              |    | x  | x   |      | x    | 1.56                    | 0.12           |
| a13 Sharpening a pencil                             | 2C                | x            | x  |    |     |      |      | 1.31                    | 0.16           |
| a11 Taking the cap off a bottle                     | 2B                | x            |    |    |     |      |      | 1.09                    | 0.23           |
| s07 Peeling onions                                  | 2C                |              |    | x  | x   |      |      | 0.91                    | 0.14           |
| a14 Spreading butter on a slice of bread            | 2B                | x            | x  |    |     |      |      | 0.74                    | 0.16           |
| b15 Fastening a snap (eg, jacket, bag)              | 2A                | x            | x  | x  | x   | x    | x    | 0.68                    | 0.09           |
| a16 Replacing a light bulb                          | 2B                | x            |    |    |     |      |      | 0.59                    | 0.30           |
| s06 Filing one's nails                              | 2C                |              |    | x  | x   |      |      | 0.59                    | 0.14           |
| s16 Replacing a light bulb                          | 2B                |              |    | x  | x   |      |      | 0.48                    | 0.15           |
| s05 Wrapping up gifts                               | 2C                |              |    | x  | x   |      |      | 0.46                    | 0.15           |
| a17 Opening mail                                    | 2B                | x            | x  |    |     |      |      | 0.41                    | 0.16           |
| a18 Handling a stapler                              | 2A                | x            |    |    |     |      |      | 0.19                    | 0.30           |
| b19 Peeling a banana                                | 2B                |              | x  |    |     | x    |      | -0.19                   | 0.15           |
| b20 Filling a glass with water                      | 2A                |              | x  |    |     | x    | x    | -0.20                   | 0.12           |
| b21 Opening a pack of biscuits                      | 2B                |              | x  |    |     | x    | x    | -0.20                   | 0.13           |
| s22 Turning on a tap                                | 1                 |              |    |    |     | x    | x    | -0.21                   | 0.15           |
| b23 Opening a car door                              | 1                 |              | x  |    | x   |      |      | -0.48                   | 0.15           |
| a24 Opening a bread box                             | 2A                |              | x  |    |     |      |      | -0.56                   | 0.22           |
| s25 Picking up a can                                | 1                 |              |    | x  | x   | x    | x    | -0.93                   | 0.12           |
| b26 Throwing a ball                                 | 1                 |              | x  |    |     | x    |      | -0.99                   | 0.16           |
| b27 Brushing one's hair                             | 1                 | x            | x  | x  | x   |      |      | -1.20                   | 0.13           |
| a28 Unwrapping candy                                | 2C                |              | x  |    |     |      |      | -1.20                   | 0.23           |
| a22 Turning on a tap                                | 1                 |              | x  |    |     |      |      | -1.41                   | 0.26           |
| b29 Washing one's face                              | 1                 | x            | x  | x  | x   |      |      | -1.63                   | 0.14           |
| a30 Placing a glass of water on a table             | 1                 | x            | x  |    |     |      |      | -1.70                   | 0.22           |
| s31 Dealing cards                                   | 2B                |              |    |    |     | x    |      | -1.80                   | 0.25           |
| a32 Drinking a glass of water                       | 1                 | x            | x  |    |     |      |      | -1.87                   | 0.25           |
| a33 Handling a 4-colour ballpoint pen with one hand | 1                 | x            |    |    |     |      |      | -2.02                   | 0.37           |
| a34 Counting banknotes                              | 2A                | x            |    |    |     |      |      | -2.20                   | 0.29           |
| b35 Turning on a radio                              | 1                 | x            |    | x  | x   | x    |      | -2.28                   | 0.18           |
| a36 Wiping one's hands                              | 2A                |              | x  |    |     |      |      | -2.32                   | 0.26           |
| s37 Using a fork                                    | 1                 |              | x  |    |     | x    | x    | -2.51                   | 0.21           |
| s38 Turning on a television                         | 1                 |              |    | x  | x   | x    | x    | -2.56                   | 0.18           |
| b39 Piling up Lego® blocks                          | 2A                |              | x  |    |     | x    |      | -2.74                   | 0.21           |
| b40 Using a spoon                                   | 1                 | x            |    | x  | x   |      |      | -3.35                   | 0.17           |
| a38 Turning on a television                         | 1                 | x            | x  |    |     |      |      | -3.43                   | 0.38           |
| a41 Turning off a tap                               | 1                 | x            |    |    |     |      |      | -3.54                   | 0.56           |
| s42 Blowing one's nose                              | 1                 |              |    | x  | x   |      |      | -3.93                   | 0.23           |

\* higher logit values indicate a greater manual ability for more difficult activities.

a: asymmetric disorders (CS, CP); s: symmetric disorders (RA, SSc, NMDc, NMDa); b: both symmetric and asymmetric disorders; 1 indicates unimanual activities; 2 indicates bimanual activities manageable in several unimanual steps (2A); requiring stabilization with one hand and digital activity with the other (2B); requiring digital activity from both hands (2C). CS: chronic stroke; CP: cerebral palsy; RA: rheumatoid arthritis; SSc: systemic sclerosis; NMDc: neuromuscular children; NMDa: neuromuscular adults; SE: standard error.

### Manual ability across diagnostic groups

Figure 4 shows the distribution of manual ability across the six diagnostic groups. Significant differences in manual ability measures were observed among diagnoses ( $p < 0.001$ ). The CP and NMDc groups had significantly less manual ability than the RA group, who in turn had less manual ability than CS, SSc and NMDa patients ( $p < 0.05$ , Dunn's pairwise comparisons).

### Comparison of the generic and disease-specific scales

As reported in Table 3, standard errors of patient locations were greater for the generic scale than for disease-specific scales, and a smaller range of patient measures was observed in the generic scale. The generic scale is globally less accurate than the disease-specific scales leading to a higher number of extreme persons. In addition, Table 3 shows that manual ability measures of generic and disease-specific scales were highly correlated (range: 0.94–0.97).

Table 3. Comparison of generic and disease-specific scales

| Diagnostic group | Generic scale                  |                            |                      | Disease-specific scales        |                            |                      | Relationship between the measures of generic and disease-specific scales<br>R (p-value) |
|------------------|--------------------------------|----------------------------|----------------------|--------------------------------|----------------------------|----------------------|-----------------------------------------------------------------------------------------|
|                  | Median SE of measures (logits) | Range of measures (logits) | Extreme subjects (%) | Median SE of measures (logits) | Range of measures (logits) | Extreme subjects (%) |                                                                                         |
| CS               | 0.50                           | 7.06                       | 11                   | 0.46                           | 8.56                       | 08                   | 0.95 (< 0.001)                                                                          |
| CP               | 0.53                           | 10.87                      | 09                   | 0.49                           | 11.98                      | 11                   | 0.95 (< 0.001)                                                                          |
| RA               | 0.61                           | 8.27                       | 09                   | 0.44                           | 8.68                       | 09                   | 0.96 (< 0.001)                                                                          |
| SSc              | 0.66                           | 8.45                       | 21                   | 0.46                           | 10.64                      | 12                   | 0.95 (< 0.001)                                                                          |
| NMDc             | 0.70                           | 6.78                       | 23                   | 0.53                           | 8.12                       | 15                   | 0.94 (< 0.001)                                                                          |
| NMDa             | 1.08                           | 10.48                      | 40                   | 0.70                           | 11.14                      | 31                   | 0.97 (< 0.001)                                                                          |

CS: chronic stroke; CP: cerebral palsy; RA: rheumatoid arthritis; SSc: systemic sclerosis; NMDc: neuromuscular children; NMDa: neuromuscular adults; SE: standard error associated to subjects' measure; R: Pearson correlation.

## DISCUSSION

The present study investigated the applicability of a generic manual ability scale unbiased by diagnosis across six populations. We analysed previous subject responses gathered during calibrations of disease-specific ABILHAND questionnaires, and we examined similarities and differences in manual ability among diagnostic groups. A unidimensional scale was constructed with 11 items sharing a common location between diagnostic groups and 41 items



1  
2  
3 having a location specific to asymmetric (CS and CP) or symmetric (NMD, RA, and SSc)  
4  
5 disorders. The resulting generic scale revealed that CP and NMD children had significantly  
6  
7 less manual ability than RA patients, who in turn had significantly less manual ability than  
8  
9 CS, SSc, and NMD adults.

10  
11 A generic manual ability scale should best meet the requirements of upper limb rehabilitation,  
12  
13 insofar as a common instrument with a diagnosis-independent calibration can be used across  
14  
15 clinical settings. Of course, the use of a generic scale assumes that individuals achieving  
16  
17 identical activities have the same manual ability level regardless of their diagnosis. However,  
18  
19 this assumption may not hold true in clinical practice. In our study, we found that only 11 out  
20  
21 of 52 items had difficulties unbiased by diagnosis indicating that individuals' underlying  
22  
23 diseases may bias the perceived difficulty of manual activities. Using a sample size of 100  
24  
25 patients per diagnostic group, a DIF of 1 logit, namely the approximate amplitude of DIF  
26  
27 observed for the items split between symmetric and asymmetric disorders (see Figure 2), in a  
28  
29 test containing 10 items or more answered by at least 100 subjects can be detected at a  
30  
31 significance level of 0.05 with a power of 95% or more.[28] This indicates that the power of  
32  
33 the DIF observed in our study is more than adequate considering the study setup (i.e., test  
34  
35 length, sample size, and significance level). Our results differ from those of Simone et al.[27]  
36  
37 who found that the 23 CS-specific ABILHAND item scale “can be routinely applied to a  
38  
39 variety of motor impairments.” These authors argue that the item hierarchy can be  
40  
41 successfully preserved across diagnoses. Using our patient responses, we conducted a  
42  
43 comparable analysis on the same 23 items from the CS-specific ABILHAND scale as Simone  
44  
45 et al.[27] Our findings showed that 21 items (91%) presented a significant DIF, which  
46  
47 contrasts with the apparent invariance reported by Simone et al.[27] Two factors may  
48  
49 contribute to the observed differences in results: sample size and case mix. Our sample  
50  
51 included 732 patients which is significantly more than the 150 subjects in the Simone et al.  
52  
53  
54  
55  
56  
57  
58  
59  
60

1  
2  
3 study.[27] In addition, the unbalanced case mix in the Simone et al.[27] project (83 CS, 17  
4 multiple sclerosis, 13 ataxia, 10 tetraplegics, 3 Parkinson's disease, and 24 healthy controls)  
5 may have concealed possible disease influences on difficulty ratings.  
6  
7

8  
9 An explicit construct theory initiated the development of disease-specific ABILHAND scales.  
10 For each diagnosis, the scale content was selected to delineate a single unidimensional  
11 construct, correlated to the patients' functional, clinical, and demographic characteristics.[6-  
12 10] The nature of the measured variable, namely manual ability, can be determined by  
13 investigating the factors contributing to the hierarchy of manual item difficulty that is  
14 observed across diagnoses. To address this issue, we developed an original methodology that  
15 combines DIF tests, PCA, and manual activities categorization about their nature. Although  
16 an activity is expressed in the same way for all patients, its perceived difficulty may vary  
17 according to one's disease or disorder and the specificity of underlying motor impairments.  
18  
19

20  
21  
22  
23  
24  
25  
26  
27  
28  
29  
30 Several studies have also shown that manual ability limitations are, at least partially, related to  
31 underlying upper limb impairments.[6, 29] Hence, it is not surprising that disease  
32 characteristics contribute to the difficulties experienced in performing manual activities.  
33

34  
35  
36 The PCA results suggest that the vast majority (85%) of the difficulty variations  
37 observed in manual activities across diagnostic groups was explained by two characteristics:  
38 1) the symmetric or asymmetric nature of the disorder (57% of the item difficulty hierarchy  
39 variations observed across disorders), and 2) the proximal or distal nature of the disorder  
40 (28% of the item difficulty variations). For example, activities requiring greater bimanual  
41 involvement (e.g., "peeling potatoes with a knife") tended to be rated as more difficult by  
42 patients with asymmetric disorders (CP children and CS adults) than by patients with more  
43 symmetric disorders (RA, SSc, NMDc, NMDa). On the other hand, unimanual activities (e.g.,  
44 "turning on a television") or bimanual activities manageable in several unimanual steps (e.g.,  
45 "handling a stapler") were rated as less difficult for patients with asymmetric disorders, likely  
46  
47  
48  
49  
50  
51  
52  
53  
54  
55  
56  
57  
58  
59  
60

1  
2  
3 because these activities can be achieved by exclusively using the unaffected or less affected  
4 hand.[7, 30] Activities involving the shoulder (e.g., “drinking a glass of water”) were  
5  
6 generally more difficult for NMD and CP patients. Indeed, the NMD groups included several  
7  
8 diseases in which proximal segments were more likely to be affected than distal ones (e.g.,  
9  
10 Duchenne/limb girdle muscular dystrophy, facio-scapulo-humeral dystrophy, spinal muscular  
11  
12 atrophy).[10] Moreover, and contrary to other diagnoses, NMD and CP groups included  
13  
14 subjects in a wheelchair, which may prevent the achievement of activities such as, “ringing a  
15  
16 door bell”, or “replacing a light bulb”. In contrast, digital activities (e.g. “winding up a  
17  
18 wristwatch”) were particularly difficult for SSc subjects, who have reduced digital  
19  
20 dexterity.[9] Other characteristics of the diseases than their symmetric/asymmetric or  
21  
22 proximal/digital nature may explain, even though to a lesser extent, the variations of item  
23  
24 difficulty hierarchy between disorders. Activities inducing high mechanical constraints on the  
25  
26 upper limb joints (e.g. “screwing on a nut”) presented the highest challenge for RA patients  
27  
28 due to wrist and metacarpophalangeal joint involvement.[8] Similar to a previous study,[31]  
29  
30 activities related to dressing (e.g., “fastening the zipper of a jacket”) and self-care (e.g.,  
31  
32 “cutting one’s nails”) were more challenging for children than for adults as well as activities  
33  
34 requiring turning something (e.g., “turning on/off a tap”). Parents of unhealthy children may  
35  
36 inhibit some activities to prevent risk (e.g., “cutting one’s nails”) or save time (e.g., dressing  
37  
38 items).[32] Activities related to eating (e.g., “unwrapping a chocolate bar”) were easier for  
39  
40 children than for adults. It can be hypothesized that children are more motivated to  
41  
42 compensate their hand impairments by learning adapted strategies (such as breaking down a  
43  
44 bimanual activity into several unimanual sequences) for eating activities than for dressing or  
45  
46 self-care tasks.[29] It is also important to note that several activities presented a DIF for more  
47  
48 than one reason.  
49  
50  
51  
52  
53  
54  
55  
56  
57  
58  
59  
60

1  
2  
3 Nevertheless, using 11 linked items unbiased by diagnoses, we successfully constructed, from  
4  
5 a metric point of view, a unidimensional scale common to six diagnostic groups by separating  
6  
7 items with difficulties specific to asymmetric and to symmetric disorders. In our study, the  
8  
9 obtained standard errors on items estimates on the generic ABILHAND scale range from 0.09  
10  
11 to 0.56 logits, average 0.20 logits, and correspond to the expected values regarding sample  
12  
13 size and targeting.[33] The strong correlations ( $R \geq 0.94$ ) observed between the generic scale  
14  
15 and each of the disease-specific ABILHAND scales point out that they measure the same  
16  
17 construct, namely, manual ability. However, disease-specific scales which often included a  
18  
19 greater number of disease-relevant activities enable more accurate measures (i.e., patient  
20  
21 estimates have lower standard errors) than the generic scale. This is most likely due to the fact  
22  
23 that disease-specific scales have been constructed to maximize their person separation  
24  
25 reliability and therefore also their accuracy. Overall, our findings are consistent with several  
26  
27 studies showing that disease-specific instruments are substantially more discriminative and  
28  
29 responsive to small deficits than generic instruments.[34, 35] Consequently, this increased  
30  
31 sensitivity allows for the detection and quantification of small, yet clinically significant health  
32  
33 changes.[11, 12] For example, ABILHAND disease-specific scales should be used to  
34  
35 determine pathology impacts on manual ability, to measure clinical changes consecutive to  
36  
37 specific treatments, and to tailor interventions to the specific needs of individuals with a  
38  
39 particular diagnosis. All of these concerns are important for patients and clinicians in their  
40  
41 daily practice. In contrast, the generic ABILHAND scale allows the manual ability of patients  
42  
43 with different diagnoses to be compared and can be used, for example, to identify the relative  
44  
45 burden of diagnoses, compare various health-care programs, and demonstrate evidence of  
46  
47 cost-effectiveness of different healthcare interventions.[11, 12, 36] According to this generic  
48  
49 scale, children had, on the whole, less manual ability than adults. This finding is consistent  
50  
51  
52  
53  
54  
55  
56  
57  
58  
59  
60

1  
2  
3 with previous results[31, 37] showing that children have relatively greater difficulty with  
4  
5 manipulation activities than adults.  
6

7 The generic ABILHAND scale includes 52 items: 11 items sharing a common location  
8  
9 between diagnostic groups and 41 items having a location specific to asymmetric or  
10  
11 symmetric disorders. The 11 common items were used to establish links that connect the 41  
12  
13 items specific to the symmetry of the disorders to place all measures in the same frame of  
14  
15 reference (i.e., on the same “ruler”). From a metric point of view, the common-item linking  
16  
17 has enabled the development of a generic scale that can be used to compare subjects with  
18  
19 various diagnoses since they are located on one single continuum. However, only one fifth of  
20  
21 the items of the “generic” scale are common to several diagnoses. From a clinical point of  
22  
23 view, this means that most manual activities present a difficulty that varies according to the  
24  
25 underlying diagnosis and that various pathologies may affect differently the achievement of  
26  
27 daily activities. The finding that the difficulties of most manual activities were disease-  
28  
29 dependent emphasizes the danger of using generic scales without prior investigation of item  
30  
31 invariance across diagnostic groups.  
32  
33  
34  
35  
36  
37  
38  
39  
40  
41  
42  
43  
44  
45  
46  
47  
48  
49  
50  
51  
52  
53  
54  
55  
56  
57  
58  
59  
60

**COMPETING INTERESTS**

None declared.

**FUNDING**

This research received no specific grant from any funding agency in the public, commercial or not-for-profit sectors.

**CONTRIBUTORSHIP STATEMENT**

CA performed the statistical analyses, conducted the literature search, and drafted the manuscript. CA, LV, and MP participated in the data collection. CA, LV, MP, and JLT contributed to the study design and the data analysis. All authors participated in the data interpretation, critically revised the draft of the manuscript for important intellectual content, and contributed to the writing. All authors have read and approved the final manuscript.

**DATA SHARING STATEMENT**

Dataset is available from the corresponding author at [carlyne.arnould@gmail.com](mailto:carlyne.arnould@gmail.com)

## REFERENCES

1. Cardol M, de Jong BA, van den Bos GA, *et al.* Beyond disability: perceived participation in people with a chronic disabling condition. *Clin Rehabil* 2002;**16**:27–35.
2. Grimby G, Tennant A, Tesio L. The use of raw scores from ordinal scales: time to end malpractice? *J Rehabil Med* 2012;**44**:97–8.
3. Merbitz C, Morris J, Grip JC. Ordinal scales and foundations of misinference. *Arch Phys Med Rehabil* 1989;**70**:308–12.
4. Wright BD, Linacre JM. Observations are always ordinal; measurement, however, must be interval. *Arch Phys Med Rehabil* 1989;**70**:857–60.
5. Rasch G. *Probabilistic models for some intelligence and attainment tests*. Chicago: Mesa Press, 1980.
6. Penta M, Tesio L, Arnould C, *et al.* The ABILHAND questionnaire as a measure of manual ability in chronic stroke patients: Rasch-based validation and relationship to upper limb impairment. *Stroke* 2001;**32**:1627–34.
7. Arnould C, Penta M, Renders A, *et al.* ABILHAND-Kids: a measure of manual ability in children with cerebral palsy. *Neurology* 2004;**63**:1045–52.
8. Durez P, Fraselle V, Houssiau F, *et al.* Validation of the ABILHAND questionnaire as a measure of manual ability in patients with rheumatoid arthritis. *Ann Rheum Dis* 2007;**66**:1098–105.
9. Vanthuyne M, Smith V, Arat S, *et al.* Validation of a manual ability questionnaire in patients with systemic sclerosis. *Arthritis Rheum* 2009;**61**:695–703.
10. Vandervelde L, Van den Bergh PY, Penta M, *et al.* Validation of the ABILHAND questionnaire to measure manual ability in children and adults with neuromuscular disorders. *J Neurol Neurosurg Psychiatry* 2010;**81**:506–12.

11. Patrick DL, Deyo RA. Generic and disease-specific measures in assessing health status and quality of life. *Med Care* 1989;**27**(3 Suppl):217–32S.
12. Marra CA, Woolcott JC, Kopec JA, *et al.* A comparison of generic, indirect utility measures (the HUI2, HUI3, SF-6D, and the EQ-5D) and disease-specific instruments (the RAQol and the HAQ) in rheumatoid arthritis. *Soc Sci Med* 2005;**60**:1571–82.
13. Haigh R, Tennant A, Biering-Sorensen F, *et al.* The use of outcome measures in physical medicine and rehabilitation within Europe. *J Rehabil Med* 2001;**33**:273–8.
14. Tennant A, McKenna SP, Hagell P. Application of Rasch analysis in the development and application of quality of life instruments. *Value Health* 2004; **7**(Suppl 1):22–6.
15. Holland PW, Wainer H. *Differential Item Functioning*. Hillsdale, New Jersey: Lawrence Erlbaum, 1993.
16. Tennant A, Penta M, Tesio L, *et al.* Assessing and adjusting for cross-cultural validity of impairment and activity limitation scales through differential item functioning within the framework of the Rasch model: the PRO-ESOR project. *Med Care* 2004;**42**(1 Suppl): 37–48S.
17. Andrich D. Category ordering and their utility. *Rasch Measurement Transactions* 1996;**9**:464–5.
18. Andrich D. *Rasch analysis for measurement*. London: Sage Publications Ltd; 1988.
19. RUMM Laboratory. *Interpreting RUMM2020: Part 1, dichotomous data*. Perth, Western Australia: RUMM Laboratory, 2004.
20. RUMM Laboratory. *Interpreting RUMM2020: Part 2, polytomous data*. Perth, Western Australia: RUMM Laboratory, 2004.
21. Equating/linking with anchors. *Rasch Measurement Transactions* 2004;**18**:993.
22. Wright B. Anchoring & standard-errors. *Rasch Measurement Transactions* 1993;**6**:259.



- 1  
2  
3 23. Ingebo G. Linking tests with the Rasch model. *Rasch Measurement Transactions*  
4  
5 1997;11:549.  
6  
7 24. Lundgren-Nilsson A, Tennant A, Grimby G, *et al.* Cross-diagnostic validity in a generic  
8  
9 instrument: an example from the Functional Independence Measure in Scandinavia.  
10  
11 *Health Qual Life Outcomes* 2006;4:55.  
12  
13 25. Dallmeijer AJ, de Groot V, Roorda LD, *et al.* Cross-diagnostic validity of the SF-36  
14  
15 physical functioning scale in patients with stroke, multiple sclerosis and amyotrophic  
16  
17 lateral sclerosis: a study using Rasch analysis. *J Rehabil Med* 2007;39:163–9.  
18  
19 26. Wann-Hansson C, Klevsgard R, Hagell P. Cross-diagnostic validity of the Nottingham  
20  
21 health profile index of distress (NHPD). *Health Qual Life Outcomes* 2008;6:47.  
22  
23 27. Simone A, Rota V, Tesio L, *et al.* Generic ABILHAND questionnaire can measure  
24  
25 manual ability across a variety of motor impairments. *Int J Rehabil Res* 2011;34:131–40.  
26  
27 28. Scott NW, Fayers PM, Aaronson NK, *et al.* A simulation study provided sample size  
28  
29 guidance for differential item functioning (DIF) studies using short scales. *J Clin*  
30  
31 *Epidemiol* 2009;62:288–95.  
32  
33 29. Arnould C, Penta M, Thonnard J-L. Hand impairments and their relationship with manual  
34  
35 ability in children with cerebral palsy. *J Rehabil Med* 2007;39:708–14.  
36  
37 30. Sakzewski L, Ziviani J, Boyd R. The relationship between unimanual capacity and  
38  
39 bimanual performance in children with congenital hemiplegia. *Dev Med Child Neurol*  
40  
41 2010;52:811–6.  
42  
43 31. Haley SM, Ludlow LH. Applicability of the hierarchical scales of the Tufts Assessment of  
44  
45 Motor Performance for school-aged children and adults with disabilities. *Phys Ther*  
46  
47 1992;72:191–202.  
48  
49  
50  
51  
52  
53  
54  
55  
56  
57  
58  
59  
60

- 1  
2  
3 32. Sperle PA, Ottenbacher KJ, Braun SL, *et al.* Equivalence reliability of the Functional  
4  
5 Independence Measure for Children (WeeFIM®) administration methods. *Am J Occup*  
6  
7 *Ther* 1997;**51**:35–41.  
8  
9 33. Linacre JM. Sample Size and Item Calibration Stability. *Rasch Measurement*  
10  
11 *Transactions* 1994;**7**:328.  
12  
13 34. Murawski MM, Miederhoff PA. On the generalizability of statistical expressions of health  
14  
15 related quality of life instrument responsiveness: a data synthesis. *Qual Life Res*  
16  
17 1998;**7**:11–22.  
18  
19 35. Wiebe S, Guyatt G, Weaver B, *et al.* Comparative responsiveness of generic and specific  
20  
21 quality-of-life instruments. *J Clin Epidemiol* 2003;**56**:52–60.23.  
22  
23 36. Mazur W, Kupiainen H, Pitkaniemi J, *et al.* Comparison between the disease-specific  
24  
25 Airways Questionnaire 20 and the generic 15D instruments in COPD. *Health Qual Life*  
26  
27 *Outcomes* 2011;**9**:4.  
28  
29 37. van Eck M, Dallmeijer AJ, van Lith IS, *et al.* Manual ability and its relationship with daily  
30  
31 activities in adolescents with cerebral palsy. *J Rehabil Med* 2010;**42**:493–8.  
32  
33  
34  
35  
36  
37  
38  
39  
40  
41  
42  
43  
44  
45  
46  
47  
48  
49  
50  
51  
52  
53  
54  
55  
56  
57  
58  
59  
60

## FIGURE LEGENDS

**Figure 1.** Flow diagram illustrating the analysis process steps. DIF = differential item functioning; PCA = principal component analysis; CS = chronic stroke; CP = cerebral palsy; NMDc = neuromuscular children; NMDa = neuromuscular adults; RA = rheumatoid arthritis; and SSc = systemic sclerosis.

**Figure 2.** Disease-specific patterns of item difficulty according to the bimanual or proximal nature of the activities showing a Differential Item Functioning. Differences between item difficulty ratings specific to each diagnostic group ( $\delta_{\text{specific}}$ ) and the average item difficulty for all diagnoses ( $\delta_{\text{mean}}$ ) are shown for each disorder (CS = chronic stroke; CP = cerebral palsy; RA = rheumatoid arthritis; SSc = systemic sclerosis; NMDc = neuromuscular children; and NMDa = neuromuscular adults). Boxes indicate the 25% and 75% limits (the interquartile range); the vertical line inside each box indicates the median; vertical bars outside each box indicate the 10% and 90% limits and dots indicate the 5% and 95% outliers.

**Figure 3.** PCA results based upon differences between disease-specific difficulty of the split DIF items and the average item difficulty across all diagnoses. CP = cerebral palsy; NMDc = neuromuscular children; RA = rheumatoid arthritis; SSc = systemic sclerosis; and NMDa = neuromuscular adults. CS = chronic stroke;

**Figure 4.** Box plots showing the distribution of manual ability measures for each diagnosis. Boxes indicate the 25% and 75% limits (the interquartile range); the vertical line inside each box indicates the median; vertical bars outside each box indicate the 10% and 90% limits and dots indicate the 5% and 95% outliers. CP = cerebral palsy; NMDc = neuromuscular children; RA = rheumatoid arthritis; NMDa = neuromuscular adults; SSc = systemic sclerosis; and CS = chronic stroke.

Supplementary table. Original set of items answered by  
at least two diagnostic groups

| Item                                   | Submitted to* |          |          |          |          |          |
|----------------------------------------|---------------|----------|----------|----------|----------|----------|
|                                        | CS            | CP       | RA       | SSc      | NMDc     | NMDa     |
| <b>Eating</b>                          |               |          |          |          |          |          |
| Using a spoon                          | x             |          | x        | x        |          |          |
| Using a fork                           |               | x        |          |          | x        | x        |
| Cutting meat                           | <b>X</b>      | x        | <b>X</b> | <b>X</b> | x        | x        |
| Eating a sandwich                      | x             | x        | x        | x        |          |          |
| Picking up a can                       | x             | x        | <b>X</b> | x        | x        | x        |
| Placing a glass of water on a table    | x             | x        | x        | x        | x        | x        |
| Drinking a glass of water              | x             | x        | x        | x        | x        | x        |
| Filling a glass with water             |               | <b>X</b> |          |          | <b>X</b> | <b>X</b> |
| Unscrewing a bottle cap                |               | <b>X</b> |          |          | x        | x        |
| Taking the cap off a bottle            | <b>X</b>      |          | <b>X</b> | <b>X</b> |          | <b>X</b> |
| Spreading butter on a slice of bread   | <b>X</b>      | x        | x        | <b>X</b> | <b>X</b> | <b>X</b> |
| Opening a bread box                    |               | <b>X</b> |          |          | <b>X</b> | <b>X</b> |
| Tearing open a pack of chips           | <b>X</b>      | <b>X</b> | <b>X</b> | <b>X</b> | <b>X</b> |          |
| Unwrapping a chocolate bar             | <b>X</b>      | <b>X</b> | x        | <b>X</b> | <b>X</b> |          |
| Opening a pack of biscuits             |               | x        |          |          | <b>X</b> | <b>X</b> |
| Unwrapping candy                       |               | x        |          |          | x        | x        |
| Peeling a banana                       |               | x        |          |          | x        |          |
| Shelling hazel nuts                    | <b>X</b>      |          | x        | <b>X</b> |          |          |
| Opening a screw-topped jar             | <b>X</b>      | <b>X</b> | <b>X</b> | <b>X</b> | x        | x        |
| Peeling onions                         | <b>X</b>      |          | <b>X</b> | <b>X</b> |          |          |
| Peeling potatoes with a knife          | <b>X</b>      |          | <b>X</b> | <b>X</b> |          | x        |
| Making pancake batter                  | x             |          | x        | x        |          |          |
| <b>Grooming</b>                        |               |          |          |          |          |          |
| Opening the cap of a toothpaste tube   |               | <b>X</b> |          |          | <b>X</b> | <b>X</b> |
| Squeezing toothpaste onto a toothbrush | <b>X</b>      | <b>X</b> | x        | x        | <b>X</b> | <b>X</b> |
| Brushing one's teeth                   | x             | x        | x        | x        | x        | x        |
| Brushing one's hair                    | x             | x        | <b>X</b> | <b>X</b> |          |          |
| Combing one's hair                     | x             | <b>X</b> | x        | x        | x        | x        |
| Washing one's face                     | x             | x        | x        | x        |          |          |
| Washing one's hands                    | <b>X</b>      | x        | x        | x        | <b>X</b> | <b>X</b> |
| Wiping one's hands                     |               | x        |          |          | <b>X</b> | <b>X</b> |
| Cutting one's nails                    | <b>X</b>      | x        | <b>X</b> | <b>X</b> |          | <b>X</b> |
| Filing one's nails                     | <b>X</b>      |          | <b>X</b> | x        |          |          |
| Blowing one's nose                     | x             | x        | x        | x        |          |          |
| <b>Dressing</b>                        |               |          |          |          |          |          |
| Fastening the zipper of a jacket       | <b>X</b>      | <b>X</b> | <b>X</b> | <b>X</b> | <b>X</b> | <b>X</b> |
| Fastening a snap (eg, jacket, bag)     | <b>X</b>      | <b>X</b> | <b>X</b> | <b>X</b> | <b>X</b> | <b>X</b> |
| Buttoning up a shirt                   | <b>X</b>      | <b>X</b> | x        | x        | <b>X</b> | <b>X</b> |
| Pulling up the zipper of trousers      | <b>X</b>      | <b>X</b> | x        | x        | x        | x        |
| Buttoning up trousers                  | <b>X</b>      | <b>X</b> | x        | <b>X</b> | x        | x        |
| Lacing shoes                           |               | x        |          | <b>X</b> | x        | x        |
| Rolling up a sleeve of a sweater       |               | <b>X</b> |          |          | x        |          |
| Putting on gloves                      |               |          |          |          | x        | x        |

\* Items included in disease-specific ABILHAND scales are marked by a large bold cross.

CS: chronic stroke; CP: cerebral palsy; RA: rheumatoid arthritis; SSc: systemic sclerosis;

NMDc: neuromuscular children; NMDa: neuromuscular adults.

Supplementary table. Original set of items answered by  
at least two diagnostic groups

| Item                                            | Submitted to |          |          |          |          |          |
|-------------------------------------------------|--------------|----------|----------|----------|----------|----------|
|                                                 | CS           | CP       | RA       | SSc      | NMDc     | NMDa     |
| <b>Environment</b>                              |              |          |          |          |          |          |
| Turning on a radio                              | x            |          | x        | x        | x        |          |
| Turning on a television                         | x            | x        | x        | x        | x        | x        |
| Switching on a bedside lamp                     | x            | <b>X</b> | x        | x        |          | x        |
| Turning off a tap                               | x            |          | <b>X</b> | <b>X</b> | <b>X</b> | <b>X</b> |
| Turning on a tap                                |              | x        |          |          | <b>X</b> | <b>X</b> |
| Closing a door                                  | x            |          | x        | x        |          |          |
| Inserting a key in a keyhole                    |              | x        |          |          |          | <b>X</b> |
| Turning a key in a keyhole                      | x            | x        | <b>X</b> | x        | <b>X</b> | <b>X</b> |
| Ringling a door bell                            | x            | x        | x        | x        |          | x        |
| <b>Communication</b>                            |              |          |          |          |          |          |
| Handling a 4-colour ballpoint pen with one hand | x            |          | <b>X</b> | x        |          |          |
| Writing a sentence                              | x            |          | <b>X</b> | x        | x        | x        |
| Opening mail                                    | <b>X</b>     | x        | x        | <b>X</b> |          | x        |
| Dialling on a keypad phone                      | x            | x        | x        | x        | x        | x        |
| Inserting a diskette in a disk drive            | x            | x        | x        | x        | x        | x        |
| Using a computer keyboard                       |              |          |          |          | x        | x        |
| Typewriting                                     | x            |          | x        | x        |          |          |
| Turning over the pages of a book                | x            | x        | x        | x        | x        | x        |
| <b>Do-it-yourself</b>                           |              |          |          |          |          |          |
| Sharpening a pencil                             | <b>X</b>     | <b>X</b> | <b>X</b> | x        | <b>X</b> |          |
| Drawing                                         | x            |          | x        | x        | x        |          |
| Drawing a line with a ruler                     |              | x        |          |          | x        |          |
| Colouring                                       |              | x        |          |          | x        |          |
| Painting                                        |              | x        |          |          | x        |          |
| Using an eraser                                 |              | x        |          |          | x        |          |
| Handling scissors                               |              | x        |          | <b>X</b> | x        |          |
| Handling a stapler                              | x            |          | <b>X</b> | <b>X</b> |          |          |
| Threading a needle                              | <b>X</b>     |          | <b>X</b> | <b>X</b> |          |          |
| Screwing on a nut                               | x            |          | <b>X</b> | x        |          |          |
| Using a screwdriver                             | x            |          | <b>X</b> | x        |          |          |
| Hammering a nail                                | <b>X</b>     |          | <b>X</b> | x        |          |          |
| Replacing a light bulb                          | x            |          | <b>X</b> | x        |          |          |
| <b>Leisure and play</b>                         |              |          |          |          |          |          |
| Throwing a ball                                 |              | x        |          |          | x        |          |
| Catching a ball                                 |              | x        |          |          | x        |          |
| Piling up Lego® blocks                          |              | x        |          |          | x        |          |
| Dealing cards                                   |              | x        |          |          | <b>X</b> |          |
| Using a joystick                                |              | x        |          |          | x        |          |
| <b>Miscellaneous</b>                            |              |          |          |          |          |          |
| Taking a coin out of the pocket                 | x            | <b>X</b> | <b>X</b> | <b>X</b> |          | x        |
| Grasping a coin on a table                      | x            | x        | <b>X</b> | x        | x        | x        |
| Putting a coin in a piggy bank                  |              | x        |          |          | x        |          |
| Counting banknotes                              | x            |          | x        | x        |          | <b>X</b> |
| Winding up a wristwatch                         | x            |          | x        | <b>X</b> |          |          |
| Wrapping up gifts                               | <b>X</b>     |          | <b>X</b> | x        |          |          |
| Opening a car door                              |              | x        |          | x        |          |          |

\* Items included in disease-specific ABILHAND scales are marked by a large bold cross.

CS: chronic stroke; CP: cerebral palsy; RA: rheumatoid arthritis; SSc: systemic sclerosis;

NMDc: neuromuscular children; NMDa: neuromuscular adults.

For peer review only - <http://bmjopen.bmj.com/site/about/guidelines.xhtml>

1  
2  
3  
4  
5  
6  
7  
8  
9  
10  
11  
12  
13  
14  
15  
16  
17  
18  
19  
20  
21  
22  
23  
24  
25  
26  
27  
28  
29  
30  
31  
32  
33  
34  
35  
36  
37  
38  
39  
40  
41  
42  
43  
44  
45  
46  
47  
48  
49  
50  
51  
52  
53  
54  
55  
56  
57  
58  
59  
60

Figure 1

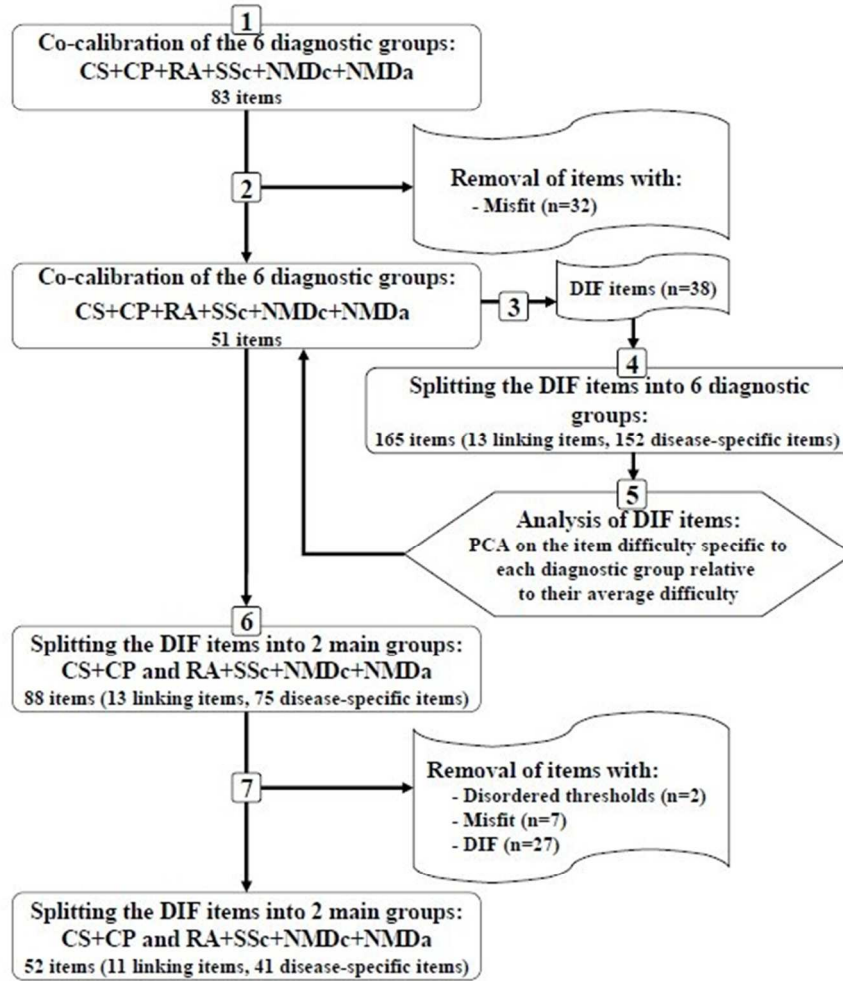

Figure 2

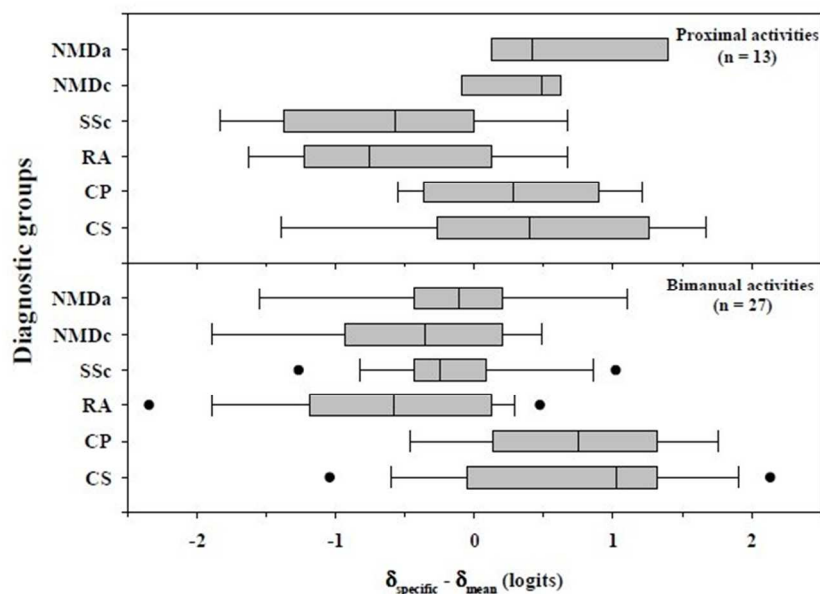

ew only

1  
2  
3  
4  
5  
6  
7  
8  
9  
10  
11  
12  
13  
14  
15  
16  
17  
18  
19  
20  
21  
22  
23  
24  
25  
26  
27  
28  
29  
30  
31  
32  
33  
34  
35  
36  
37  
38  
39  
40  
41  
42  
43  
44  
45  
46  
47  
48  
49  
50  
51  
52  
53  
54  
55  
56  
57  
58  
59  
60

Figure 3

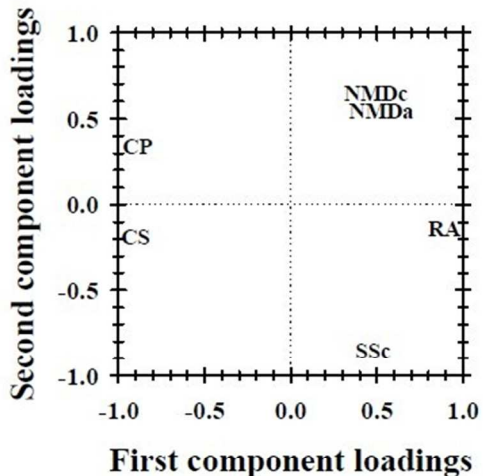

view only



Figure 4

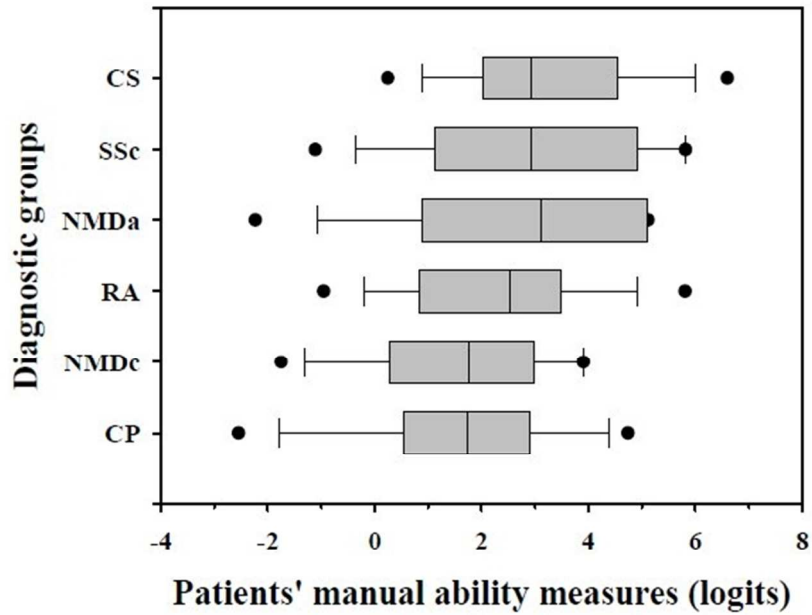

ew only
