# Supplementary material for: Can manual ability be measured with a generic ABILHAND scale? A cross-sectional study conducted on six diagnostic groups
Source: HighWire-hosted journal article supplement (doi:10.1136/bmjopen-2012-001807), 2012-01-01
Supplement: bmjopen-2012-001807supp_table.pdf [file bmjopen-2012-001807supp_table.pdf]

**Supplementary table. Original set of items answered by  
at least two diagnostic groups**

| Item                                   | Submitted to* |          |          |          |          |          |
|----------------------------------------|---------------|----------|----------|----------|----------|----------|
|                                        | CS            | CP       | RA       | SSc      | NMDc     | NMDa     |
| <b>Eating</b>                          |               |          |          |          |          |          |
| Using a spoon                          | x             |          | x        | x        |          |          |
| Using a fork                           |               | x        |          |          | x        | x        |
| Cutting meat                           | <b>X</b>      | x        | <b>X</b> | <b>X</b> | x        | x        |
| Eating a sandwich                      | x             | x        | x        | x        |          |          |
| Picking up a can                       | x             | x        | <b>X</b> | x        | x        | x        |
| Placing a glass of water on a table    | x             | x        | x        | x        | x        | x        |
| Drinking a glass of water              | x             | x        | x        | x        | x        | x        |
| Filling a glass with water             |               | <b>X</b> |          |          | <b>X</b> | <b>X</b> |
| Unscrewing a bottle cap                |               | <b>X</b> |          |          | x        | x        |
| Taking the cap off a bottle            | <b>X</b>      |          | <b>X</b> | <b>X</b> |          | <b>X</b> |
| Spreading butter on a slice of bread   | <b>X</b>      | x        | x        | <b>X</b> | <b>X</b> | <b>X</b> |
| Opening a bread box                    |               | <b>X</b> |          |          | <b>X</b> | <b>X</b> |
| Tearing open a pack of chips           | <b>X</b>      | <b>X</b> | <b>X</b> | <b>X</b> | <b>X</b> |          |
| Unwrapping a chocolate bar             | <b>X</b>      | <b>X</b> | x        | <b>X</b> | <b>X</b> |          |
| Opening a pack of biscuits             |               | x        |          |          | <b>X</b> | <b>X</b> |
| Unwrapping candy                       |               | x        |          |          | x        | x        |
| Peeling a banana                       |               | x        |          |          | x        |          |
| Shelling hazel nuts                    | <b>X</b>      |          | x        | <b>X</b> |          |          |
| Opening a screw-topped jar             | <b>X</b>      | <b>X</b> | <b>X</b> | <b>X</b> | x        | x        |
| Peeling onions                         | <b>X</b>      |          | <b>X</b> | <b>X</b> |          |          |
| Peeling potatoes with a knife          | <b>X</b>      |          | <b>X</b> | <b>X</b> |          | x        |
| Making pancake batter                  | x             |          | x        | x        |          |          |
| <b>Grooming</b>                        |               |          |          |          |          |          |
| Opening the cap of a toothpaste tube   |               | <b>X</b> |          |          | <b>X</b> | <b>X</b> |
| Squeezing toothpaste onto a toothbrush | <b>X</b>      | <b>X</b> | x        | x        | <b>X</b> | <b>X</b> |
| Brushing one's teeth                   | x             | x        | x        | x        | x        | x        |
| Brushing one's hair                    | x             | x        | <b>X</b> | <b>X</b> |          |          |
| Combing one's hair                     | x             |          | <b>X</b> | x        | x        | x        |
| Washing one's face                     | x             | x        | x        | x        |          |          |
| Washing one's hands                    | <b>X</b>      | x        | x        | x        | <b>X</b> | <b>X</b> |
| Wiping one's hands                     |               | x        |          |          | <b>X</b> | <b>X</b> |
| Cutting one's nails                    | <b>X</b>      | x        | <b>X</b> | <b>X</b> |          | <b>X</b> |
| Filing one's nails                     | <b>X</b>      |          | <b>X</b> | x        |          |          |
| Blowing one's nose                     | x             | x        | x        | x        |          |          |
| <b>Dressing</b>                        |               |          |          |          |          |          |
| Fastening the zipper of a jacket       | <b>X</b>      | <b>X</b> | <b>X</b> | <b>X</b> | <b>X</b> | <b>X</b> |
| Fastening a snap (eg, jacket, bag)     | <b>X</b>      | <b>X</b> | <b>X</b> | <b>X</b> | <b>X</b> | <b>X</b> |
| Buttoning up a shirt                   | <b>X</b>      | <b>X</b> | x        | x        | <b>X</b> | <b>X</b> |
| Pulling up the zipper of trousers      | <b>X</b>      | <b>X</b> | x        | x        | x        | x        |
| Buttoning up trousers                  | <b>X</b>      | <b>X</b> | x        | <b>X</b> | x        | x        |
| Lacing shoes                           |               | x        |          | <b>X</b> | x        | x        |
| Rolling up a sleeve of a sweater       |               | <b>X</b> |          |          | x        |          |
| Putting on gloves                      |               |          |          |          | x        | x        |

\* Items included in disease-specific ABILHAND scales are marked by a large bold cross.  
CS: chronic stroke; CP: cerebral palsy; RA: rheumatoid arthritis; SSc: systemic sclerosis;  
NMDc: neuromuscular children; NMDa: neuromuscular adults.

**Supplementary table. Original set of items answered by  
at least two diagnostic groups**

| Item                                            | Submitted to |          |          |          |          |          |
|-------------------------------------------------|--------------|----------|----------|----------|----------|----------|
|                                                 | CS           | CP       | RA       | SSc      | NMDc     | NMDa     |
| <b>Environment</b>                              |              |          |          |          |          |          |
| Turning on a radio                              | x            |          | x        | x        | x        |          |
| Turning on a television                         | x            | x        | x        | x        | x        | x        |
| Switching on a bedside lamp                     | x            | <b>X</b> | x        | x        |          | x        |
| Turning off a tap                               | x            |          | <b>X</b> | <b>X</b> | <b>X</b> | <b>X</b> |
| Turning on a tap                                |              | x        |          |          | <b>X</b> | <b>X</b> |
| Closing a door                                  | x            |          | x        | x        |          |          |
| Inserting a key in a keyhole                    |              | x        |          |          |          | <b>X</b> |
| Turning a key in a keyhole                      | x            | x        | <b>X</b> | x        | <b>X</b> | <b>X</b> |
| Ringling a door bell                            | x            | x        | x        | x        |          | x        |
| <b>Communication</b>                            |              |          |          |          |          |          |
| Handling a 4-colour ballpoint pen with one hand | x            |          | <b>X</b> | x        |          |          |
| Writing a sentence                              | x            |          | <b>X</b> | x        | x        | x        |
| Opening mail                                    | <b>X</b>     | x        | x        | <b>X</b> |          | x        |
| Dialling on a keypad phone                      | x            | x        | x        | x        | x        | x        |
| Inserting a diskette in a disk drive            | x            | x        | x        | x        | x        | x        |
| Using a computer keyboard                       |              |          |          |          | x        | x        |
| Typewriting                                     | x            |          | x        | x        |          |          |
| Turning over the pages of a book                | x            | x        | x        | x        | x        | x        |
| <b>Do-it-yourself</b>                           |              |          |          |          |          |          |
| Sharpening a pencil                             | <b>X</b>     | <b>X</b> | <b>X</b> | x        | <b>X</b> |          |
| Drawing                                         | x            |          | x        | x        | x        |          |
| Drawing a line with a ruler                     |              | x        |          |          | x        |          |
| Colouring                                       |              | x        |          |          | x        |          |
| Painting                                        |              | x        |          |          | x        |          |
| Using an eraser                                 |              | x        |          |          | x        |          |
| Handling scissors                               |              | x        |          | <b>X</b> | x        |          |
| Handling a stapler                              | x            |          | <b>X</b> | <b>X</b> |          |          |
| Threading a needle                              | <b>X</b>     |          | <b>X</b> | <b>X</b> |          |          |
| Screwing on a nut                               | x            |          | <b>X</b> | x        |          |          |
| Using a screwdriver                             | x            |          | <b>X</b> | x        |          |          |
| Hammering a nail                                | <b>X</b>     |          | <b>X</b> | x        |          |          |
| Replacing a light bulb                          | x            |          | <b>X</b> | x        |          |          |
| <b>Leisure and play</b>                         |              |          |          |          |          |          |
| Throwing a ball                                 |              | x        |          |          | x        |          |
| Catching a ball                                 |              | x        |          |          | x        |          |
| Piling up Lego <sup>®</sup> blocks              |              | x        |          |          | x        |          |
| Dealing cards                                   |              | x        |          |          | <b>X</b> |          |
| Using a joystick                                |              | x        |          |          | x        |          |
| <b>Miscellaneous</b>                            |              |          |          |          |          |          |
| Taking a coin out of the pocket                 | x            | <b>X</b> | <b>X</b> | <b>X</b> |          | x        |
| Grasping a coin on a table                      | x            | x        | <b>X</b> | x        | x        | x        |
| Putting a coin in a piggy bank                  |              | x        |          |          | x        |          |
| Counting banknotes                              | x            |          | x        | x        |          | <b>X</b> |
| Winding up a wristwatch                         | x            |          | x        | <b>X</b> |          |          |
| Wrapping up gifts                               | <b>X</b>     |          | <b>X</b> | x        |          |          |
| Opening a car door                              |              | x        |          | x        |          |          |

\* Items included in disease-specific ABILHAND scales are marked by a large bold cross.

CS: chronic stroke; CP: cerebral palsy; RA: rheumatoid arthritis; SSc: systemic sclerosis;

NMDc: neuromuscular children; NMDa: neuromuscular adults.
